1 Evolution of phenotypic plasticity in response to ethanol between sister species with different ecological  
2 histories (*Drosophila melanogaster* and *D. simulans*)

3

4 Sarah A. Signor<sup>1\*</sup>, Sergey V. Nuzhdin<sup>1</sup>

5

6 1. Molecular and Computational Biology, Dornsife College of Letters, Arts and Sciences, University of  
7 Southern California.

8 \* Communicating author: [ssignor@usc.edu](mailto:ssignor@usc.edu)

9

10 Running title: Evolution of plasticity to ethanol

11

12

13

14

15 *D. melanogaster* sequence data have been submitted to GenBank: accession number PRJNA482662. *D.*

16 *simulans* sequence data will be made available upon acceptance.

17

18

19

20

21

22 Abstract

23 The role of phenotypic plasticity in evolution is contentious, in part because different types of plasticity –  
24 adaptive, neutral, or non-adaptive, are often not distinguished. Adaptive plasticity is expected to facilitate  
25 expansion into new environments, while non-adaptive plasticity will result in a mean phenotype further  
26 from the adaptive optimum and/or an increase in variance due to the expression of variation that was  
27 neutral and shielded from selection in the prior environment. We explore these patterns here by exposing  
28 *Drosophila melanogaster* and *D. simulans* to high ethanol concentrations, with the knowledge that *D.*  
29 *melanogaster* associates with high concentrations of ethanol in nature while *D. simulans* does not. Using  
30 changes in gene expression and splicing we find that in *D. simulans* there is a large genotype-specific  
31 response to ethanol, orders of magnitude larger than any effect that is not genotype-specific. In *D.*  
32 *melanogaster* the response to ethanol is limited, and it is concordant among different genotypes. This  
33 response to ethanol in *D. simulans* is enriched for non-protein coding nested genes that do not have  
34 orthologs in *D. melanogaster*, suggesting rapid evolution of transcription. Sequence variation in ethanol-  
35 implicated genes is consistent with balancing selection or selection relaxation in *D. simulans*, and they are  
36 more divergent from *D. melanogaster* than the genome average. Overall, these patterns are consistent  
37 with a maladaptive passive response to ethanol-induced stress in *D. simulans*, while in *D. melanogaster*  
38 the reduced response and lack of genotype-specific variation suggests selection for an optimal response.

39

40 Keywords: phenotypic plasticity, *Drosophila*, ethanol, alternative splicing

41

42

43

44

45

46

47

48

49

50

51

52

53

54

55

56

## 57 Introduction

58 Genetic variation (G) occurs when there are differences in a phenotype due to genotypic differences  
59 among individuals within a population (Figure 1A). In contrast, plasticity – i.e. environment specific (E)  
60 adjustment in phenotype - can occur without genetic variation between individuals and is a change in a  
61 given phenotype in response to an external stimulus (Figure 1A). When components of variance are  
62 estimated plasticity is the part of phenotypic variation attributable to environmental variation. Plasticity  
63 is a ubiquitous property of organisms, and it may be adaptive, neutral, or maladaptive with regard to the  
64 fitness of a plastic individual (Ghalambor *et al.* 2007; Lande 2009; Marais *et al.* 2013). Genetic variation  
65 in plasticity (G x E) describes variation between genotypes for the response to the environment (Figure  
66 1A). Quantifying genetic variation, plasticity, and genetic variation for plasticity is important for  
67 understanding the genotype to phenotype map and adaptation. For example, the evolution of a reduced  
68 plastic response (E) can reconfigure the relationship between fitness and the environment, redrawing the  
69 genotype to phenotype map. In another example, genetic variation in plasticity can make the evolution of  
70 locally adapted populations unpredictable in response to environmental change.

71 It is often assumed that plasticity is adaptive, however phenotypic plasticity can be adaptive,  
72 neutral, or maladaptive. This depends on the evolutionary history of exposure to the agent causing  
73 plasticity. Were such exposure infrequent, plasticity could arise as a passive consequence of  
74 environmental stress. This is likely an important, or perhaps prevalent, form of phenotypic plasticity  
75 (Ghalambor *et al.* 2007; 2015). One potential prediction arising from stress inducing passive phenotypic  
76 plasticity is that within population variation for performance is expected to be greater, as stress breaks  
77 down buffering mechanisms that might normally reduce between individual variation (Joshi & Thompson  
78 1997). Thus under lower stress conditions, populations will exhibit less individual and genetic variation  
79 compared to high stress, rare conditions (Ghalambor *et al.* 2007). The novel or rare high stress  
80 environment is essentially uncovering cryptic variation that was allowed to neutrally accumulate in lower  
81 stress environments where selection was unable to shape the reaction norm (Rutherford 2000).

82 When a population colonizes a new habitat, this could manifest as a transient increase in G x E,  
83 followed by a reduction in genetic variation for plasticity, assuming that there is selection for a single  
84 optimal phenotype in response to the environment (Via & Lande 1985; Guntrip & Sibly 1998; Lande  
85 2009; Matzkin 2012; Huang & Agrawal 2016). The maintenance of plasticity, or loss of plasticity, would  
86 then depend upon the frequency with which the population continues to experience multiple  
87 environments, or the cost of maintaining the plastic response (Joshi & Thompson 1997; Lande 2009;  
88 Scoville & Pfrender 2010; Lee *et al.* 2011; Hodgins-Davis *et al.* 2012). Thus if phenotypic plasticity is  
89 costly to maintain, or the organism no longer experiences the previous environment, the expectation is  
90 that phenotypic plasticity will transition to local adaptation.

91 In this manuscript we will examine plasticity and genetic variation for plasticity in response to  
92 ethanol in *D. simulans* and *D. melanogaster*, two species with divergence adaptive histories with respect  
93 to ethanol. *D. melanogaster* and *D. simulans* are thought to have originated in or around Africa (*D.*  
94 *melanogaster*, southern-central Africa, *D. simulans*, Madagascar) followed by an out-of-Africa expansion  
95 ~10,000 years ago, however *D. melanogaster* may have colonized Europe and America earlier than *D.*  
96 *simulans* (David and Capy 1988; Lachaise *et al.* 1988; Baudry *et al.* 2004; Li and Stephan 2006; Thornton  
97 and Andolfatto 2006). *Drosophila simulans* is thought to have colonized the Americas in the last 100  
98 years, creating a large and more recent population bottleneck than in *D. melanogaster* (Sturtevant 1920;  
99 Signor *et al.* 2017c).

100 *D. melanogaster* and *D. simulans* are cosmopolitan species and human commensals, however  
101 while *D. melanogaster* is commonly found inside houses, breweries, and wineries, *D. simulans* is more  
102 often observed in orchards and parks (though their niches overlap significantly and they are often found  
103 on the same patches) (David & Bocquet 1976; Parsons & King 1977; McKenzie & McKechnie 1979;  
104 Parsons & Spence 1981; Dickinson *et al.* 1984; Gibson & Wilks 1988; Thomson *et al.* 1991; Chakir *et al.*  
105 1993; Mercot *et al.* 1994; Joshi & Thompson 1997). *D. melanogaster* is considerably more ethanol  
106 tolerant than *D. simulans*, and is found regularly feeding upon and ovipositing in resources with ethanol

107 concentrations greater than 8% (Hoffmann & McKechnie 1991; Fry 2014; Zhu & Fry 2015). At  
108 concentrations of 4% ethanol *D. simulans* shows reductions in survivorship and increased development  
109 time relative to *D. melanogaster* (Joshi & Thompson 1997). However, at low concentrations of ethanol  
110 (0.5 - 3.0%) adult *D. simulans* show increases in longevity (less so than adult *D. melanogaster*, which  
111 increases longevity from 0.5 - 9.0%) (Parsons *et al.* 1979). During multi-generation exposure to ethanol-  
112 rich substrates in the lab, *D. simulans* evolves tolerance (Joshi & Thompson 1997; Lefèvre *et al.* 2012). It  
113 has been demonstrated that ethanol tolerance comes as a trade-off that reduces the efficacy of processing  
114 other biochemical targets, thus it is possible that in *D. simulans* this trade-off is under different selective  
115 pressure (Chakraborty & Fry 2016). However, ethanol is by no means a novel resource for *D. simulans*.

116 In general genetic adaptation and phenotypic plasticity are considered as alternative adaptive  
117 strategies in response to the environment (Schlichting & Pigliucci, 1998). For a variety of traits *D.*  
118 *simulans* has been observed to be ‘plastic’ while *D. melanogaster* is described as being locally adapted  
119 (David & Bocquet 1975; Hyytia *et al.* 1985; Watada *et al.* 1986; Singh 1989). For example, for  
120 temperature tolerance *D. simulans* has been shown to exhibit less difference between populations and to  
121 produce ‘optimal’ phenotypes under a wider range of environments (consistent with adaptive plasticity)  
122 (Austin & Moehring 2013). This includes less differentiation between populations, in that populations  
123 from different temperatures show similar levels of plasticity across temperatures. Population genetic  
124 surveys generally corroborate these phenotypic observations, where *D. melanogaster* also shows greater  
125 differences between populations, and more evidence of clinal variation than in *D. simulans* (Singh 1989;  
126 Weeks *et al.* 2002; Hoffmann & Weeks 2006; Schmidt & Paaby 2008; Machado *et al.* 2015; Sedghifar *et*  
127 *al.* 2016; Bergland *et al.* 2016; Signor *et al.* 2017c). However, *D. simulans* has generally been observed to  
128 harbor more within population diversity than *D. melanogaster* (Machado *et al.* 2015; Sedghifar *et al.*  
129 2016; Signor *et al.* 2017c).

130 Gene expression is both affected by the environment and mediates an organisms response to the  
131 environment. It has been shown to be plastic in response to many environmental variables such as heat  
132 stress, ethanol, and the presence of predators (Hodgins-Davis & Townsend 2009; Levine *et al.* 2011;  
133 Yampolsky *et al.* 2012; Hodgins-Davis *et al.* 2012). While many studies have quantified the effect of the  
134 environment on gene expression, far fewer have performed these experiments in multiple genotypes  
135 within a common garden to obtain the interaction between genotype and the environment for gene  
136 expression (DeBiasse & Kelly 2015). Indeed, most work on gene expression plasticity has not quantified  
137 G x E, and has found inconsistent results with regard to theoretical expectations for the maintenance of  
138 plasticity (Cheviron *et al.* 2008; McCairns & Bernatchez 2009; Hodgins-Davis *et al.* 2012; DeBiasse &  
139 Kelly 2015; Heckel *et al.* 2016; Mathur & Schmidt 2016). Furthermore, many plastic responses are time  
140 dependent, and if performed in a common garden without sampling across time points may not detect  
141 early plastic responses that usher in ‘maintenance’ phenotypes, or dynamic responses to the environment  
142 (Aubin-Horth & Renn 2009; Lewis *et al.* 2014). In addition, alternative splicing has been shown to  
143 respond to changes in the environment, and it is thought to diverge more rapidly than gene expression  
144 between lineages (Barbosa-Morais *et al.* 2012; Merkin *et al.* 2012; Gueroussov & Gonatopoulos-  
145 Pournatzis 2015; Jakšić & Schlötterer 2016; Wang *et al.* 2017; Pajoro *et al.* 2017; Singh *et al.* 2017;  
146 Calixto *et al.* 2018). As such it may be an important component of plasticity, necessary for adaptation to  
147 rapidly changing and heterogeneous environments (Marais *et al.* 2013; Preußner *et al.* 2017; Price *et al.*  
148 2018; Calixto *et al.* 2018). Furthermore, it has been previously implicated in the response to ethanol, and  
149 in *D. melanogaster* may be a more important component of the response than gene expression changes  
150 (Oomizu *et al.* 2003; Newton *et al.* 2004; Pietrzykowski *et al.* 2008; Sasabe & Ishiura 2010; Hemby  
151 2012; Zaharieva *et al.* 2012; Robinson & Atkinson 2013; Signor & Nuzhdin 2018). However, alternative  
152 splicing is rarely accounted for in studies of plasticity.

153 Overall, we compare plasticity in response to ethanol, including genetic variation for plasticity  
154 over time and between genotypes, among *Drosophila* species with different patterns of ethanol utilization.  
155 We measure plasticity and variation in expression and splicing in response to ethanol treatment, and we  
156 observe that in *D. melanogaster*, which regularly exploits ethanol-rich substrates, there is essentially no  
157 genetic variation for plasticity. This suggests the following scenario: for *D. simulans* high ethanol

158 concentrations are essentially a novel stressful environment that reveals cryptic variation for phenotypic  
159 plasticity, while *D. melanogaster* does not experience high stress under 15% ethanol and cryptic variation  
160 is not revealed. Furthermore, *D. melanogaster* does not experience high stress as it is adapted to ethanol  
161 and genetic variation has been removed in favor of an optimal, and reduced, plastic response  
162

## 163 Methods

### 164 *Fly lines*

165 Male flies for *D. melanogaster* originated from six genotypes collected from an orchard in Winters,  
166 California in 1998 and made isogenic by 40 generations of full sibling inbreeding (Yang & Nuzhdin  
167 2003; Campo *et al.* 2013; Signor *et al.* 2017a; b). Male flies for *D. simulans* came from six genotypes  
168 collected from the Zuma Organic Orchard in the winter of 2012 and made isogenic by 15 generations of  
169 full sib inbreeding (Signor *et al.* 2017b; c). Residual heterozygosity is similar between these lines of *D.*  
170 *melanogaster* and *D. simulans* (Campo *et al.* 2013; Signor *et al.* 2017c). In natural conditions flies will  
171 not be homozygous at all loci, thus each inbred genotype was crossed to a white eyed ‘tester’ strain to  
172 create the F1 flies used in the ethanol exposure assays (*D. melanogaster*, *w<sup>1118</sup>*, Bloomington stock  
173 number 3605; *D. simulans*, *w<sup>501</sup>*, Cornell species stock number 14021-0251.011). This design allows us  
174 to replicate observations of gene expression because the flies are identical twins, while also maintaining  
175 heterozygosity such that they more closely resemble wild type flies. Rearing occurred on a standard  
176 medium at 25 °C with a 12-h light/12-h dark cycle. Several measures were taken to standardize offspring  
177 quality: F1 flies were produced from females of the same age, these females were held at the same density  
178 (10 individuals per sex/vial), males used for ethanol exposure assays were collected as virgins and reared  
179 in single sex vials, and males used for assays were held at a standard density (24-30 per vial).

180 During the ethanol exposure assay a female was included as a stimulus, but was not collected for  
181 RNA-seq (Signor *et al.* 2017a; b). The females were from *y<sup>1</sup>w<sup>1</sup>* mutants for both *D. simulans* and *D.*  
182 *melanogaster* (*D. melanogaster*, Bloomington stock number 1495, *D. simulans*, Cornell species stock  
183 number 14021-0251.013). Quality of the females was controlled in the same manner as previously  
184 described for males, and both males and females were aged three to four days before being used in the  
185 ethanol exposure assay.

### 186 *Experiment setup*

187 Ethanol exposure took place in a circular arena, each of which was part of a larger chamber containing 12  
188 arenas each with a diameter of 2.54 cm (VWR cat. no. 89093-496). Prior to the assay the flies were  
189 sedated through exposure at 4 °C for ten minutes, to avoid the confounding effects of CO<sub>2</sub> exposure on  
190 behavior and gene expression. Once the flies were sedated they were placed in the arenas with a  
191 paintbrush (two males and one female per arena) and the chambers were secured with two small pieces of  
192 cryogenic tape. It is standard to allow organisms to recover in a new location for ten minutes prior to  
193 beginning behavioral assays, which was a portion of the goal of this study, so the chambers were left  
194 upside down for ten minutes while the flies regained consciousness and oriented themselves (Signor *et al.*  
195 2017a). The bottom of each chamber contained a standard amount of either grapefruit medium or medium  
196 in which 15% of the water has been replaced with ethanol. During ethanol administration the flies were  
197 recorded using VideoGrabber (<http://code.google.com/p/video-grabber/>), and set-up of the assays was  
198 facilitated with FlyCapture (PointGrey, Canada). In order to better standardize the transcriptional  
199 response, these videos were also used to determine if any male/female pairs mated during the assay or any  
200 flies were damaged during setup, and flies in those chambers were not collected for RNA-seq.

201 Assays were conducted for ten, 20, or 30 minutes for three replicates of each of the two conditions.  
202 Flies are most active during the hours following dawn, thus to standardize behavior and circadian rhythms  
203 all assays were conducted within a two-hour window after dawn. Replicates for both species were  
204 conducted randomly under standardized conditions (25 °C, 70% humidity). At the conclusion of the assay

205 the chambers were flash frozen in liquid nitrogen, allowed to freeze through, transferred to dry ice, and all  
206 of the males were collected for RNA-seq. For both *D. melanogaster* and *D. simulans* the expectation is  
207 that intoxication is occurring through inhalation of ethanol vapors, and evidence of the behavioral effects  
208 in both species and the efficacy of this approach have been published previously (Signor *et al.* 2017a; b).

### 209 *Sample preparation and RNA sequencing*

210 Sample preparation has been described previously, and will be briefly summarized here (Signor & Nuzhdin  
211 2018). Flash-frozen flies were freeze dried and ten to 12 heads were placed into a 96-tube plate (Axygen  
212 MTS-11-C-R). mRNA purification, cDNA synthesis and library preparation were carried out by RAPiD  
213 GENOMICS (<http://rapid-genomics.com>) using a robot. mRNA was purified using Dynabeads mRNA  
214 DIRECT Micro kit (Invitrogen # 61021) with slight modifications. To fragment the RNA mRNA-beads  
215 were resuspended in 10 uL 2X first strand buffer (Invitrogen # 18064-014), incubated at 80 C for two  
216 minutes and placed on ice, then the supernatant was collected after five minutes on magnetic stand. First  
217 strand synthesis was performed using standard protocols for Superscript II (Invitrogen #18640-014) and  
218 reverse transcription (25 C 10 min, 42 C for 50 min, 70 C for 15 min, 10 C hold). Second strand synthesis  
219 was carried out using standard protocols with DNA Pol I and incubated at 16 C for 2.5 hours. cDNA was  
220 purified with 1.8 volume of AMPure XP following manufactures instructions (Beckman Coulter A63880).  
221 Illumina RNAseq libraries were prepared by Rapid Genomics (<http://rapid-genomics.com/home/>) using  
222 dual barcodes. Sequencing was performed using the Illumina HiSeq 2500 as both 2×150 bp or 2×50 bp  
223 reads. The two run lengths (and runs) were intended to provide extra coverage, and all replicates were  
224 sequenced in both runs.

### 225 *Gene expression analysis*

226 It is common in organisms with alternative splicing for exons from different isoforms of a single gene to  
227 overlap with one another, or be shared between all or most isoforms (Figure 1B). Short read data  
228 fundamentally cannot resolve these exons to individual isoforms, however, one approach is to quantify each  
229 exon separately and decompose exons overlapping between isoforms into those which are shared and  
230 unique. When the differences between overlapping exons are less than 10 bp, there is no appreciable  
231 amount of information loss in not decomposing overlapping exons, and this approach has been taken in the  
232 past (Dalton *et al.* 2013; Graze *et al.* 2014; Newell *et al.* 2016; Fear *et al.* 2016). However, in many cases  
233 the differences in exon overlap are much larger than this, so to address this issue we use a classification  
234 scheme where reads may be assigned to exons, exonic regions, or exon fragments (Signor & Nuzhdin 2018)  
235 (Figure 1B). Exon boundaries were determined using the *D. melanogaster* FlyBase 6.17 genome features  
236 file and the *D. simulans* 2.02 genome features file. A single exon is one that does not overlap any other  
237 exons, and it may be unique to a single isoform, shared between several (common), or shared between all  
238 isoforms (constitutive). If a gene has only a single transcript then every exons it contains will be both unique  
239 and constitutive. When exons overlap other exons from different isoforms, they are grouped together into  
240 an exonic region, and they may be common to some isoforms or constitutive to all, but they are not unique  
241 given that by definition they require overlap between exons. When overlapping exons differ measurably,  
242 we used the 5' and 3' positions of the exons within the region to create exon fragments. An exon fragment  
243 may exclusive to a single isoform (unique) or common/constitutive (Figure 1B). For exon fragments there  
244 is only one unique situation in which it may be both constitutive and unique – when the exons of two genes  
245 overlap, and one of those genes has a single transcript, such that the non-overlapping portion of the exon  
246 belonging to the gene with one transcript will become a unique and constitutive exon fragment. Alignment  
247 was performed using BWA-MEM version 0.7.15 and BED files were used to count reads in each region  
248 and obtain the length adjusted read count (reads in region divided by the length of region), and the APN  
249 (average per nucleotide) (Li 2015).

250 The APN was summed for technical replicates of the same read length then averaged between read  
251 lengths to handle the mixture of read lengths for each sample (2×150 bp and 2×50 bp). If the APN was  
252 greater than zero in at least half of all samples per condition it was considered detected. While we

253 considered several approaches to normalize coverage counts upper-quartile normalization with log-  
254 transformation and median centering within time × treatment × genotype were selected due to better  
255 performance of the residuals (Bullard *et al.* 2010; Dillies *et al.* 2013).

256 To test the significance of components of expression variation, the log APN for each exonic region was  
257 modeled as

$$258 \quad Y_{ijkl} = \mu + g_i + t_j + (gt)_{ik} + m_k + (gm)_{ik} + (tm)_{ijk} + \epsilon_{ijkl}$$

259 for the  $i^{\text{th}}$  genotype ( $g_i$ ),  $j^{\text{th}}$  treatment ( $t_j$ ;  $j$  = ethanol or no ethanol),  $k^{\text{th}}$  time point ( $m_k$ ;  $k$  = 10 min, 20 min,  
260 30 min), and  $l^{\text{th}}$  replicate. For the interaction between treatment and time point, the log APN for each exonic  
261 region was modeled as

$$262 \quad Y_{ij} = \mu + t_j + \epsilon_{ij}$$

263 or the  $i^{\text{th}}$  condition (time × treatment) and  $j^{\text{th}}$  replicate. Contrasts to compare treatments within time point  
264 (ethanol versus no ethanol, for 10 min, 20 min and 30 min) were conducted. Residuals were evaluated for  
265 conformation with normality assumptions, and assumptions were met in excess of 95% of the models.

266 To evaluate whether there was evidence for splicing differences among times or treatments, exonic  
267 regions for each gene and for each sample were ranked and the most expressed region ranked as one, the  
268 least expressed exonic region as three and all others as two. Exon ranks for each gene were modeled as

$$269 \quad Y_{ijk} = \mu + r_i + t_j + (rt)_{ij} + \epsilon_{ijkl}$$

270 where  $Y_{ijk}$  is the exon rank (1,2,3) of the  $i^{\text{th}}$  exonic region of the gene,  $j^{\text{th}}$  condition (time × treatment), and  
271 the  $k^{\text{th}}$  replicate;  $r_i$  is the exonic region of the gene;  $t_j$  is condition; and  $(rt)_{ij}$  is the interaction between  
272 exonic region and condition. A more traditional GLM test could not be used due to a lack of normality in  
273 the distribution of model residuals. Accordingly, a non-parametric test must be relied upon to look for  
274 changes in exon or exonic region representation between exons of a gene and we used of a rank test to  
275 summarize changes in exon representation (Supplemental File 3). F-tests for the significance of the mean  
276 square attributed to the effect tested versus the mean square attributed to error, or the appropriate interaction  
277 term, were used. The false discovery rate was controlled using the Benjamini-Hochberg procedure, with a  
278 significance cutoff of  $\alpha = 0.05$  (Benjamini & Hochberg 1995).

## 279 *GO Analysis*

280 When a gene had more than one ortholog in *D. melanogaster* only one ortholog was included for the GO  
281 analysis, so as not to inflate the number of genes involved in a given process. This does presume that  
282 orthologs will be annotated with the same GO terms, and this is generally the case. For example, in *D.*  
283 *simulans* there is only *AOX4*, while in *D. melanogaster* there is *AOX3* and *AOX4*, but the GO terms for  
284 each are the same. However, as *D. simulans* genes are generally not independently annotated, especially  
285 those without *D. melanogaster* orthologs, if there was no *D. melanogaster* ortholog the gene was not  
286 included in the enrichment analysis. This is a significant fraction of the overall genes that were involved  
287 in the response to treatment, treatment by genotype, and genotype by treatment by time, however there is  
288 no viable alternative. Lists of significant genes were tested for GO enrichment using the PANTHER  
289 classification system (Mi *et al.* 2017). They were corrected for multiple testing and a  $p$ -value of .01 was  
290 required for significance.

## 291 *Functional class enrichment*

292 To test for functional class enrichment multigene exonic regions were not included. Every test of  
293 functional class enrichment compared the frequency of a given subcategory among all exons and exonic  
294 regions detected in the dataset compared to the frequency within a significant list of exons and exonic

295 regions. A  $\chi^2$  test was performed in R to test the significance of the enrichment of each of these  
296 categories.

### 297 *D. melanogaster* polymorphism and divergence

298 To compare polymorphism between the significant sets of genes and genome-wide averages we  
299 calculated Tajima's  $D$  genome-wide for the source populations of *D. melanogaster* and *D. simulans*. We  
300 obtained the VCF files from the Winters population sequenced by (Campo *et al.* 2013), which includes all  
301 six of the genotypes assayed here as well as 29 other inbred lines sampled from the same population at the  
302 same time. The coordinates of the genes implicated for exons, exonic regions, and exon fragments were  
303 converted from the current assembly coordinates (v6) to those used in the previous study (v5). For *D.*  
304 *simulans* we used data previously obtained from 170 individuals from this population (Signor *et al.*  
305 2017c). To obtain estimates that were consistent with our dataset (which is gene regions) we extracted  
306 regions from genome-wide VCFs that corresponded to genes as annotated in the latest assembly. Note  
307 that we are considering gene regions here rather than trying to include regulatory regions for a number of  
308 reasons: 1) Gene regions includes introns, which will include some regulatory regions and splice sites. 2)  
309 The location of regulatory regions for these genes is not well established, much less so between species  
310 where we do not know if they may have shifted locations. This approach is more conservative than  
311 including arbitrary amounts of putative upstream regulatory regions. 3) If there has been recent selection  
312 on a regulatory region it may still be linked to the gene region and show the same differences in  
313 polymorphism frequency. We excluded regions of reduced recombination near the centromeres, either 1  
314 MB or more if there were significant reductions in diversity for a broader region, calculated as extended  
315 negative Tajima's  $D$  or values of  $\pi < \frac{1}{2}$  the chromosomal average (Sedghifar *et al.* 2016; Signor *et al.*  
316 2017c). SNPs within these coordinates were separated using bedtools intersect (v2.26.0). We excluded  
317 regions from the fourth chromosome and unassembled scaffolds for the analysis of population genetic  
318 differences. In both species this is a trivial number of significant regions. Alternate SNPs that were  
319 present in  $> 99\%$  of the mapping population were excluded, as were SNPs with more than 10% missing  
320 data. Tajima's  $D$  was calculated in windows of 1 KB using VCFtools v1.12a. Windows of Tajima's  $D$   
321 that overhung the ends of genes were included in the analysis.

322 We calculated per-gene  $D_{XY}$  for the significant exons, exonic regions, and genes with significant  
323 changes in rank abundance, to determine if there were any unusual patterns of divergence for these  
324 subsets. To calculate divergence comparable regions of the genome need to be identified, and there has  
325 been considerable evolution of transcription start sites between *D. melanogaster* and *D. simulans* (Main *et al.*  
326 2013). Comparing regions annotated as the gene regions in each species introduces large and  
327 unexpected gaps in the start of the alignments. While the evolution of transcription start sites is of  
328 interest, if unaccounted for it will artificially inflate estimates of  $D_{XY}$ . Thus for genes implicated in  
329 differences in *D. melanogaster* the regions annotated as genes were blasted using ncbi blastn (v2.4.0) to  
330 the *D. simulans* assembly and then back to the *D. melanogaster* assembly and used for divergence  
331 statistics, and vice versa for *D. simulans* genes. This means that for different genes small non-coding  
332 regions may be included depending upon the direction of evolution of transcription start sites, or small  
333 portions of coding regions may be excluded. Furthermore, for genes from *D. simulans* with more than one  
334 ortholog in *D. melanogaster* the top blast hit was used, and while there may have been orthologous  
335 sequence in *D. melanogaster* (or *D. simulans*) if there was no annotated ortholog it was excluded from the  
336 analysis. For example, some of the non-protein coding genes from *D. simulans* have very conserved  
337 BLAST hits in *D. melanogaster* that are not annotated as containing genes. The sequences were aligned  
338 using the R package DECIPHER (Wright 2016) and if necessary they were reverse complimented using  
339 Biostrings (Pages *et al.* 2017, for example, in the region on 3R in *D. melanogaster* that is an inversion).  
340 Following alignment the *D. simulans* and *D. melanogaster* reads were output separately in aligned fasta  
341 format and  $D_{XY}$  was calculated using an R script courtesy of Dr. Emily Delaney, which incorporates  
342 commands from the R packages ape and pegas (Supplemetnal file 4, Paradis *et al.* 2004; Paradis 2010)).



343 This was done for every orthologous gene in the genome from *D. melanogaster* and *D. simulans*, and  
 344 each significant subset from each component of variance, to compare distributions of divergence.

345  
 346 Results

347 *Gene expression and isoform usage*

348 It is difficult to decouple alternative isoform usage from gene expression, given that many exons are  
 349 shared between isoforms or overlap other exons. To infer isoforms from short read data, one must rely  
 350 upon unique junctions or regions of individual isoforms and extrapolate to shared regions. This requires  
 351 accurate isoform annotation (knowing that any given exon/junction is found in combination with other  
 352 exons/junctions) and in general can be very noisy. Accordingly, we subscribe to a simpler but more robust  
 353 approach and summarize the abundance of different exons and exonic regions separately. We detail  
 354 overall abundance of exons, exonic regions, and exon fragments, and changes in the rank abundance of  
 355 exons within a gene (Figure 1 C&D). As illustrated in Figure 1 C&D, these approaches summarize  
 356 different features of expression and splicing – for example differences in the expression level of exon  
 357 fragments from *cabut* suggest both that there are overall expression differences for the gene between  
 358 environments, and that in both *D. simulans* and *D. melanogaster* one of the alternative isoforms is more  
 359 abundant with ethanol (Figure 1C). While exons within *Drat* change their expression in response to  
 360 ethanol by time, and between environments at 30 minutes, that doesn't capture the fact that the third exon  
 361 is most abundant in ethanol while the first is most abundant without it, suggesting differences in isoform  
 362 abundance that may also belong to unannotated isoforms (Figure 1D). In the following sections we will  
 363 first summarize changes in exon, exonic region, and exon fragment abundance followed by differences in  
 364 rank abundance between environments.

|                            | G    | ETOH | ETOH x G | ETOH x T | ETOH x G x T | 10 | 20 | 30 |
|----------------------------|------|------|----------|----------|--------------|----|----|----|
| <b>Exons</b>               |      |      |          |          |              |    |    |    |
| <i>Unique</i>              | 96   | 6    | 16       | 2        | 75           | 1  | 0  | 6  |
| <i>Unique/Constitutive</i> | 1547 | 58   | 324      | 19       | 943          | 5  | 1  | 16 |
| <i>Common</i>              | 52   | 2    | 3        | 0        | 19           | 0  | 0  | 1  |
| <i>Constitutive</i>        | 299  | 10   | 44       | 3        | 121          | 3  | 2  | 6  |
| <b>Exonic Regions</b>      |      |      |          |          |              |    |    |    |
| <i>Common</i>              | 119  | 9    | 22       | 1        | 76           | 1  | 0  | 2  |
| <i>Constitutive</i>        | 287  | 14   | 76       | 6        | 223          | 2  | 1  | 2  |
| <b>Fragments</b>           |      |      |          |          |              |    |    |    |
| <i>Unique</i>              | 101  | 2    | 5        | 2        | 26           | 1  | 1  | 2  |
| <i>Unique/Constitutive</i> | 169  | 7    | 45       | 3        | 93           | 0  | 0  | 1  |
| <i>Common</i>              | 147  | 6    | 6        | 1        | 32           | 1  | 0  | 2  |
| <i>Constitutive</i>        | 191  | 3    | 25       | 0        | 74           | 2  | 1  | 1  |

365  
 366 *Table 1: A summary of the exons, exonic regions, and exon fragments that are significantly differently*  
 367 *expressed for each component of variance. Abbreviations are as follows: (G) Genotype, (ETOH)*  
 368 *Ethanol, and (T) Time.*

369 Exons, exonic regions, and exon fragments

370 1994 exons, 406 exonic regions, and 608 exon fragments changed their expression in response to  
 371 genotype in *D. simulans*, while in *D. melanogaster* 1445 exons, 631 exonic regions, and 1135 exon  
 372 fragments altered their representation. Note that the results for *D. melanogaster* are summarized in  
 373 (Signor & Nuzhdin 2018), but are included here for comparison. 76 exons, 23 exonic regions, and 18  
 374 exon fragments changed expression in response to ethanol in *D. simulans*, compared to 15 exons, 13  
 375 exonic regions, and 21 exon fragments in *D. melanogaster*. Seven exons and exonic regions were shared  
 376 between species for treatment, *Drat*, *cabut*, *CG11741*, *CG32512*, *CG4607*, *Pino*, and *sugarbabe*. For all  
 377 discussion of shared genes, the particular exon or exonic region may or may not be the same, as well as  
 378 the direction or nature of the change in expression. The complexity of this comparison is shown in Figure

379 1C, where in *D. melanogaster cabut* has three annotated transcripts and four exon fragments (one exonic  
380 region), while in *D. simulans cabut* there are two transcripts, one exon, and two exon fragments (one  
381 exonic region). In addition, in *D. melanogaster cabut* is nested within the gene *ush*, while in *D. simulans*  
382 it is not nested. In *D. melanogaster* an area annotated as an intron in *D. simulans* is unique to its third  
383 isoform, and this is more frequent with ethanol than without; in *D. simulans* there is one unique exon  
384 fragment belonging to one isoform which is more frequent with ethanol than without, suggesting that  
385 isoform is more common in ethanol environments (Figure 1C). In *D. melanogaster* the exon fragment  
386 which is unique in *D. simulans* is not unique, and only increased frequency of its unique third isoform can  
387 be inferred (Figure 1C). 15 exons and exonic regions and three fragments had no ortholog in *D.*  
388 *melanogaster*, 12 exons and exonic regions and one exon fragment of which were non-protein coding  
389 genes, and one exon fragment and one exon/exonic region of which are labeled as pseudogenes. The  
390 interaction between genotype and treatment was significant for 387 exons, 98 exonic regions, and 81 exon  
391 fragments in *D. simulans* and three exons, no exonic regions, and no fragments in *D. melanogaster*  
392 (Figure 2 A&B). Of these, 82 exons and exonic regions and 9 exon fragments originate from genes that  
393 do not have an ortholog in *D. melanogaster*, and 58 exons and exonic regions and seven exon fragments  
394 of these were non-protein coding, while ten exons and exonic regions and one exon fragment were  
395 pseudogenes. No fusions or fragments were shared between *D. simulans* and *D. melanogaster*.

396 24 exons, seven exonic regions, and six exon fragments were significantly different in response to  
397 the interaction between ethanol and time in *D. simulans*, compared to 22 exons, eight exonic regions, and  
398 12 fragments in *D. melanogaster*. Three genes were shared between exons and exonic regions for these  
399 species, *Drat*, *cabut*, and *CG43366*. *CG43366* is the *Drosophila* homolog of human *Serpina2*, which has  
400 previously been implicated in susceptibility to chemical dependence (Agrawal *et al.* 2008). In *D. simulans*  
401 1158 exons, 299 exonic regions, and 225 exon fragments were significantly different for the interaction  
402 between genotype, ethanol, and time, while in *D. melanogaster* no exons, two exonic regions, and four  
403 exon fragments were significantly different (Figure 2 A&B). No exon fusions or fragments were shared  
404 between species for this component of variance. Of the exons and exonic regions 24 were pseudogenes,  
405 172 were non-protein coding genes, and 265 had no ortholog in *D. melanogaster*. Among exon fragments  
406 39 had no ortholog in *D. melanogaster*, of which 29 were non-protein coding genes and four were  
407 pseudogenes. None of those with orthologs were non-protein coding genes. At ten minutes nine exons,  
408 three exonic regions, and four exon fragments are significantly different between treatments, compared to  
409 two exons, one exonic region, and three exon fragments in *D. melanogaster* (Figure 2A). *cabut* is shared  
410 between exons and exonic regions in *D. melanogaster* and *D. simulans*. At 20 minutes three exons, one  
411 exonic region, and two exon fragments were different in *D. simulans*, two of which belong to *cabut* in  
412 both exons/exonic regions and exon fragments. In *D. melanogaster* one exon, four exonic regions, and  
413 five exonic fragments are different at this time point, and the gene *cabut* is shared between species for  
414 both categories. At 30 minutes 29 exons, four exonic regions, and six fragments in *D. simulans* were  
415 different between treatments, all of which have *D. melanogaster* orthologs. In *D. melanogaster* 46 exons,  
416 24 exonic regions, and 20 exon fragments were significantly different between treatments at 30 minutes.  
417 Among exons and exonic regions *Drat*, *CG32103*, *sugarbabe*, *cabut*, *Pinocchio*, *CG32512*, and *CG4607*  
418 are shared between species. Among exon fragments *cabut* and *Pinocchio* are shared.

#### 419 Shared and unique exons, exonic regions, and fragments

420 Comparisons between *D. simulans* and *D. melanogaster* are shown in Figure 2C for the three components  
421 of variance in which enough genes are implicated in *D. melanogaster* to make the frequency of different  
422 categories meaningful. When an exon is unique/constitutive it belongs to the only annotated transcript for  
423 that gene, and as such no exonic regions are unique/constitutive. However, the combined counts are  
424 shown for the common and constitutive categories. However, in *D. melanogaster* constitutive exons and  
425 exonic regions are much more common than in *D. simulans*, where unique/constitutive exons are  
426 overwhelmingly implicated. This could potentially be explained by differences in annotation, for example

427 if fewer genes have multiple transcripts annotated in *D. simulans*. While this does appear to be the case  
 428 (Supplemental Figure 1), it is unclear if it is enough to explain the discrepancy between species. It is also  
 429 possible that in response to the environment genes with alternative splicing are more important in *D.*  
 430 *melanogaster* compared to *D. simulans*. The proportion of genes in each category in *D. simulans* is  
 431 consistent between components of variance, including ethanol by genotype and ethanol by genotype by  
 432 time, again suggesting the possibility that differences in annotation are responsible. If annotation  
 433 differences are responsible this does not affect the overall results, for example the number of exons  
 434 implicated, but may make comparison between species for the number of unique versus constitutive  
 435 differences not meaningful. It also underlines the importance of not relying upon isoform annotation  
 436 when trying to understand differences in expression and alternative splicing.

437

|                    |                           | Biological Process             |                      | Cellular Component      |                      | Molecular Function         |                      |
|--------------------|---------------------------|--------------------------------|----------------------|-------------------------|----------------------|----------------------------|----------------------|
| <i>D. simulans</i> | Ethanol x genotype        |                                |                      |                         |                      |                            |                      |
|                    |                           |                                |                      | axonemal dynein complex | $3 \times 10^{-3}$   | dynein light chain binding | $3.3 \times 10^{-3}$ |
|                    | Ethanol x genotype x time |                                |                      |                         |                      |                            |                      |
|                    |                           | sensory perception of taste    | $6.6 \times 10^{-3}$ | nucleoplasm             | $6.5 \times 10^{-3}$ | RNA binding                | $7.8 \times 10^{-3}$ |
|                    |                           | detection of chemical stimulus | $8.2 \times 10^{-3}$ | cytoskeletal part       | $8.4 \times 10^{-3}$ |                            |                      |
|                    |                           |                                |                      | ciliary part            | $4.6 \times 10^{-3}$ |                            |                      |

438

439 *Table 2: A summary of the significant GO enrichment terms for D. simulans. Two components of variance*  
 440 *(genotype x time; genotype x ethanol x time) have significant terms, the cutoff is  $p < .01$ .*

441

#### 442 GO enrichment analysis

443 We report here only the results of enrichment for exons and exonic regions (Table 2). In *D. simulans* the  
 444 response to treatment, treatment by time, and the three time points were not enriched for any GO terms.  
 445 Much of the lack of enrichment is likely due to annotation issues – for example 9% of the exons  
 446 implicated in treatment over time could not be resolved to a single gene, and of the remaining genes 14%  
 447 do not have a *D. melanogaster* ortholog. Of those with annotated orthologs, 20% do not have any gene  
 448 ontology terms associated with them. A summary of significant GO terms for the remaining components  
 449 of variance is shown in Table 2. In *D. melanogaster* exons and exonic regions were not significantly  
 450 enriched for any category of genes. In general, the small number of genes implicated for many categories  
 451 precludes any conclusion of enrichment.

452

#### 453 Changes in rank abundance

454 In response to treatment 54 genes showed changes in rank abundance, two of which are without a *D.*  
 455 *melanogaster* ortholog and one of which is non-protein coding. 94 genes change the rank abundance of  
 456 their exons for the interaction between treatment and time, including seven genes with no ortholog in *D.*  
 457 *melanogaster*, five of which are non-protein coding (three are pseudogenes). In *D. melanogaster* 71 genes  
 458 changed the rank abundance of their exons in response to ethanol and 145 changed for treatment by time  
 459 (Signor & Nuzhdin 2018). No genes were shared between species. For the interaction between treatment  
 460 and time *lola*, *Mhc*, and *Prm* were shared between species. *lola* is well established as being involved in  
 461 the response to ethanol and is the *Drosophila* ortholog of *ZBTB20*, hypermethylation of which has been  
 462 associated with major depressive disorder (Davies *et al.* 2014), as well as alcohol related cancer (Shi *et al.*  
 463 2018), and the development of fatty liver disease (Liu *et al.* 2017). Figure 1D illustrates an example of a  
 464 change in rank abundance for the gene *Drat* in *D. simulans*, where with ethanol the third exon is most  
 465 abundant, and without ethanol the first exon is most abundant. While differences in exon abundance

466 summarized above capture some of this variation, as *Drat* is significant for some exons for ethanol by  
467 time and 30 minutes, the change in rank abundance highlights potential differences in exon inclusion  
468 between environments.

#### 469 *GO enrichment analysis*

470 Changes in rank abundance were not enriched for any GO terms in *D. simulans*, with the exception of  
471 peroxiredoxin activity in response to ethanol, albeit slightly above the more conservative cut-off used in  
472 our other tests ( $p = .017$ ). Peroxiredoxin activity has been associated with protection against alcohol  
473 induced liver damage (Bae *et al.* 2011; Chattopadhyay *et al.* 2015). In *D. melanogaster* genes implicated  
474 in changes in rank abundance in response to ethanol by time were enriched for cellular components actin  
475 cytoskeleton, again somewhat above our more conservative cutoff ( $p = 0.018$ ) (Signor & Nuzhdin 2018).  
476

#### 477 *In D. simulans genotype-specific reactions to the environment are abundant*

478 In *D. melanogaster* components of variance for interaction terms have very few significant genes, with  
479 the largest category being exons and exonic regions that respond to ethanol and that are different at 30  
480 minutes. *D. simulans* is roughly comparable for the majority of these categories. However, many more  
481 exons and exonic regions are significant for components of variance that interact with genotype: 1457  
482 for the interaction between genotype, treatment and time, and 486 for the interaction between genotype and  
483 treatment, compared to two and three exons and exonic regions respectively in *D. melanogaster* (Figure 2  
484 A&B). This suggests that in *D. simulans* interactions with genotype are a far more important component  
485 of the response to ethanol than in *D. melanogaster*. It is also worth noting that in *D. simulans* the  
486 response to ethanol (plasticity) is three times as large (28 exons and exonic regions in *D. melanogaster*  
487 compared to 99), though this is many order of magnitudes less of a difference than for genetic variation  
488 for plasticity.  
489

#### 490 *Genotype-specific responses are enriched for non-coding genes in D. simulans*

491 A large number of non-protein coding genes were implicated in gene expression changes in *D. simulans*  
492 in these analyses, so we applied a  $\chi^2$  test to understand if our gene lists were enriched for this functional  
493 category. The number of non-protein coding genes that were significant for ethanol, ethanol by genotype,  
494 and ethanol by genotype by time, were more than would be expected by chance in *D. simulans* (13,  $\chi =$   
495 49.598,  $p < 0.0005$ ; 68,  $\chi = 235.21$ ,  $p < 2.2 \times 10^{-16}$ ; 196,  $\chi = 727.17$ ,  $p < 2.2 \times 10^{-16}$ ). Other than  
496 the pseudogenes, these are long non-coding RNAs (lncRNAs) as the shortest is annotated at 713 bp, and  
497 the majority are over 4,000 bp (long non-coding RNAs being any non-protein coding genes over 200 nt).  
498 The interaction between treatment and time, and the differences in expression at ten, 20, and 30 minutes  
499 were not enriched for non-protein coding genes, nor were changes in rank abundance.

500 *D. melanogaster* is not enriched for non-protein coding genes in response to ethanol, ethanol by  
501 time, ethanol by genotype, ethanol by genotype by time, ten or 20 minutes, exons or exonic regions  
502 expressed only in one environment, or genes implicated in changes in rank abundance. However, at 30  
503 minutes *D. melanogaster* is enriched for non-protein coding genes, though this concerns far fewer genes  
504 than in *D. simulans* (5,  $\chi = 12.831$ ,  $p = 0.005$ ).  
505

#### 506 *Non-coding genes that respond to the environment in D. simulans do not have D. melanogaster orthologs*

507 Given that a considerable number of non-protein coding genes were implicated in this analysis for *D.*  
508 *simulans*, we were suspicious that this may be an annotation issue in *D. melanogaster*. Using the exons  
509 associated with every transcript from each of these non-protein coding genes as a reference we did not  
510 find that *D. melanogaster* reads mapped to these exons across a range of relaxed mapping parameters  
511 allowing for mismatches and gaps (using bwa mem, from defaults to -B 2 -O 3; using both the *D.*  
512 *simulans* exons or existing homologous regions in *D. melanogaster*). In several cases, such as *CG30377*,  
513 an annotated protein coding gene in *D. melanogaster* is annotated as a pseudogene in *D. simulans*, with  
514 no noted relationship between them. Therefore there may be a small number of cases in which an ortholog  
515 exists but is not recognized, but in general these non-protein coding genes appear to be unique to *D.*

516 *simulans*. It has been noted previously that lncRNAs can share high sequence similarity between related  
517 species, but be expressed in only one (Ulitsky 2016). Determining the orthology of these genes and the  
518 dynamics of non-protein coding gene evolution on the *Drosophila* phylogeny is an interesting question  
519 that will require additional future research.

520

521 *The response to the environment is enriched for nested non-protein coding genes in D. simulans*

522 In analyzing the non-protein coding genes identified in *D. simulans* we noted that many of them were  
523 nested in the introns of other genes. We investigated the frequency with which nested genes were  
524 implicated in our analysis, and nested non-protein coding genes, to understand the possibility that  
525 differences in expression could also be changes in intron retention in the parental genes (as ‘nestedness’  
526 generally refers to exons or entire genes found within the introns of other genes). Using the criteria that an  
527 exon nested in an intron must overlap the intron by at least 80 bp or 10%, we found that in *D.*

528 *melanogaster* 9.2% of exons were nested within introns, while in *D. simulans* 9.7% were nested, similar  
529 to what has been previously reported (Lee & Chang 2013). This was reflected in our data, where for both  
530 *D. melanogaster* and *D. simulans* 6.8% of exons and exonic regions were nested within introns (lower  
531 because multi-gene exons were excluded). However, among significant exons and exonic regions in *D.*  
532 *melanogaster* 18.6% were nested, while in *D. simulans* 33.5% were nested. This is a significant  
533 enrichment of exons that are nested within other introns, for both *D. melanogaster* ( $\chi = 12.344, p <$   
534  $.0004$ ) and *D. simulans* ( $\chi = 1721.1, p < 2.2 \times 10^{-16}$ ).

535 The remaining question then is whether nested genes are more likely to be non-protein coding, or  
536 whether the dataset is enriched for both. Indeed, compared to the total number of nested genes that are  
537 noncoding within the dataset, the number that are significant for the response to ethanol is enriched for  
538 nested, non-protein coding genes in *D. simulans* ( $\chi = 237.49, p < 2.2 \times 10^{-16}$ ), but not in *D.*

539 *melanogaster*. Overall *D. melanogaster* has more annotated non-protein coding genes (2963) than *D.*  
540 *simulans* (1675), and similarly more exons from noncoding genes are nested within introns (1772 *D.*

541 *melanogaster*, 1066 *D. simulans*), suggesting that this pattern is not reflective of annotation issues  
542 between the two species. However, the question remains as to why nested genes are so much more likely  
543 to be non-protein coding than non-nested genes – for example in the total dataset of *D. simulans* 9.7% of  
544 exons are nested, while of the annotated non-coding genes in *D. simulans* 63% are nested. Furthermore  
545 the importance of nested non-protein coding genes for the response to the environment, or potentially  
546 delays in splicing that are specific to certain components of variance, is unclear.

547

548 *Nested non-protein coding genes involved in the response to ethanol are regulated independently of their*  
549 *parental gene*

550 In *D. simulans* 328 significant nested genes (375 nested exons and exonic regions) are on the opposite  
551 strand as their parental gene, 75% of the total significant nested genes. Of non-protein coding genes, this  
552 bias is stronger, with 83% having the opposite strandedness as their parental gene. In *D. melanogaster* 13  
553 significant genes are nested (16 total exons and exonic regions) and of these nine are on the opposite  
554 strand as their parent gene (69%). Only one non-protein coding gene shares strandedness with its parental  
555 gene, *CR44660/drp1*. It has been observed that many nested non-protein coding genes require expression  
556 of the parental gene, share strandedness, and depend on splicing out of the parental intron for activation  
557 (miRNAs, (Boivin *et al.* 2018). In both *D. simulans* and *D. melanogaster*, however, we do not observe  
558 non-protein coding genes as being more likely to share strandedness with their parental gene among our  
559 significant nested exons and exonic regions. This suggests that whatever the reason for the observed  
560 enrichment in nested non-protein coding genes, it is likely not because the parental genes are being  
561 expressed and the nested non-protein coding genes are being spliced out of the introns. We could not test  
562 the *D. melanogaster* dataset for correlation between the expression of parental and nested genes as it is  
563 too small. However, in *D. simulans* genes that were both non-coding and shared strandedness with their  
564 parental gene had highly correlated expression differences between treatments (0.83, 14 genes). All other  
565 categories (i.e. nested non-protein coding, opposite strand) were essentially uncorrelated (0.09-0.27). We  
566 note that of the parental genes only three are also represented as significant in the main dataset, *sima*,

567 *mira*, and *bru-3* (significant in response to ethanol or genotype by ethanol). Thus it is unlikely that overall  
 568 the observed differences in expression are due to changes in the expression of the parental gene, as this  
 569 would likely result in differences in expression detected at both loci.

570

571 *Polymorphism and divergence in D. melanogaster and D. simulans*

572 We were interested to determine if the patterns of polymorphism and divergence in the genes implicated  
 573 in the response to ethanol suggested that they were evolving under a particular selection regime or were  
 574 unusually diverged compared to background levels of polymorphism or divergence. If the genes  
 575 implicated in expression differences in *D. melanogaster* had unusually low Tajima's *D*, for example, this  
 576 could suggest that directional selection for adaptation to ethanol is responsible for the observed  
 577 expression differences. This might help to clarify whether the observed expression differences are  
 578 adaptive or show evidence of adaptation. For both polymorphism and divergence in the following  
 579 sections we will compare the genome-wide background distribution of polymorphism and divergence to  
 580 differences in expression and rank abundance as a whole, rather than by components of variance, for two  
 581 reasons. Firstly, for the majority of categories other than genotype interaction terms in *D. simulans*, the  
 582 number of independent genes on each list is ~50% confounding any attempt to separate out components  
 583 of variance. Second, in *D. melanogaster* there are too few genes that are significant for many components  
 584 of variance and they cannot be considered separately.

585

|                                               | Threshold | Abundance: #<br>of outliers | Rank abundance:<br># of outliers |                                           | Threshold | Abundance:<br># of outliers | Rank abundance:<br># of outliers |
|-----------------------------------------------|-----------|-----------------------------|----------------------------------|-------------------------------------------|-----------|-----------------------------|----------------------------------|
| <i>D. melanogaster</i> candidate gene regions |           |                             |                                  | <i>D. simulans</i> candidate gene regions |           |                             |                                  |
| <i>D. melanogaster</i>                        |           |                             |                                  | <i>D. melanogaster</i>                    |           |                             |                                  |
| X-linked                                      | -1.49     | 5                           | 10                               | X-linked                                  | -1.49     | <b>13</b>                   | 11                               |
|                                               | 2.29      | 4                           | 9                                |                                           | 2.29      | <b>35</b>                   | 19                               |
| Autosomal                                     | -1.5      | 18                          | 68                               | Autosomal                                 | -1.5      | 191                         | 1                                |
|                                               | 1.9       | 13                          | 49                               |                                           | 1.9       | 225                         | 4                                |
| <i>D. simulans</i>                            |           |                             |                                  | <i>D. simulans</i>                        |           |                             |                                  |
| X-linked                                      | -1.89     | <b>0</b>                    | 10                               | X-linked                                  | -1.89     | 77                          | 77                               |
|                                               | 3.25      | <b>15</b>                   | 6                                |                                           | 3.25      | <b>46</b>                   | 4                                |
| Autosomal                                     | -1.09     | <b>0</b>                    | 37                               | Autosomal                                 | -1.09     | <b>318</b>                  | 72                               |
|                                               | 3.06      | <b>35</b>                   | 67                               |                                           | 3.06      | <b>267</b>                  | 15                               |

586

587 *Table 4: A summary of the threshold values for Tajima's D and the number of intervals in each species*  
 588 *which fall beyond this cutoff. X-linked and autosomal genes are shown separately, outlier categories*  
 589 *which are significantly enriched are shown in bold. The same numbers are shown as percentages of the*  
 590 *total number of intervals in Figure 4.*

591

592 *Polymorphism*

593 We calculated Tajima's *D* in windows of 1 kb for both all annotated gene regions in the genome and the  
 594 subset of genes implicated in differences in ethanol response in both species, and consider anything in the  
 595 top  $\pm 2.5\%$  to be an outlier. Outliers for *D. simulans* and *D. melanogaster*, separated between the X and  
 596 the autosome, are shown in Table 4, and the percentage of outliers for each category are graphed in Figure  
 597 3A.

598

599 *D. melanogaster*

600 For changes in abundance of exons and exonic regions on the X and autosome, *D. melanogaster* is not  
 601 enriched for outliers of Tajima's *D* but there are more outliers than expected in *D. simulans*  
 602 (Autosomes:  $\chi = 5.26, p < 0.02$ , X:  $\chi = 29.361, p < 0.0005$ ). In *D. melanogaster* these intervals  
 603 correspond to 27 genes, while in *D. simulans* they cover a total of 25, including both the X and

604 autosomes. Between the two lists there is considerable overlap in the location of outlier intervals, at  
605 *CG43366*, *AOX4*, *dsb*, *fumble*, *CG31875*, *Mical*, *Ada2b*, *forked*, *CG1986*, and *CG42749*.

606 For genes implicated in changes in rank abundance in *D. melanogaster*, there is also no  
607 significant enrichment for outliers of Tajima's *D* relative to the genome-wide frequency in *D.*  
608 *melanogaster* or *D. simulans*. In *D. melanogaster* on the autosome these intervals cover 59 genes, while  
609 in *D. simulans* they cover 56. *14-3-3ε*, *AcCoAs*, *boi*, *CG31522*, *CG34398*, *eff*, *elF4EHP*, *fru*, *grh*, *kay*,  
610 *lds*, *lola*, *mRpL21*, *osp*, *siz*, *Syp*, *Tep2*, and *tweek* are shared in containing outlier intervals for Tajima's *D*  
611 in both *D. simulans* and *D. melanogaster*. In *D. simulans* on the X chromosome these intervals cover  
612 four genes, while in *D. melanogaster* they cover nine, and two are in common between the species  
613 (*CG34417*, *Ten-a*).

#### 614 615 ***D. simulans***

616 Many more genes were implicated in the response to ethanol in *D. simulans*, and for exons and exonic  
617 regions that changed in abundance there was an excess of outliers for Tajima's *D* for the autosomes and  
618 the X chromosome (Table 4; Figure 3; Autosomes:  $\chi = 9.41$ ,  $p = 0.0022$ , X:  $X = 14.03$ ,  $p = 0.00018$ ).  
619 These intervals correspond to 428 unique genes, and many outlier intervals overlap the same gene region.  
620 For example, every 1 kb interval that overlaps the gene *Cubilin* is an outlier, with an average of -2.41.  
621 Polymorphisms in the human ortholog of *Cubilin*, *CUBN*, have been associated with lifetime rates of  
622 heavy drinking (Hamidovic *et al.* 2013). It is worth noting here that the outliers that were significantly  
623 enriched in the *D. melanogaster* dataset for *D. simulans* were all in the positive direction, while these are  
624 both positive and negative. Given the tendency towards positive Tajima's *D* in this population of *D.*  
625 *simulans*, negative values of Tajima's *D* may be a more suggestive measure of selection, either purifying  
626 or directional (Signor *et al.* 2017c). In *D. melanogaster* the genes that were implicated in changes in the  
627 expression of exons and exonic in response to ethanol in *D. simulans* were less enriched for outliers on  
628 the X chromosome than expected, and not enriched on the autosomes (X:  $\chi = 6.38$ ,  $p = .0012$ ).

629 For genes implicated in changes in rank abundance in *D. simulans* there was a significant  
630 enrichment compared to genome-wide frequency for both the autosomes and the X (Autosomes:  $\chi =$   
631  $19.78$ ,  $p < 8.7 \times 10^{-6}$ , X:  $\chi = 458.73$ ,  $p < 2.2 \times 10^{-16}$ ). This includes intervals in 44 unique genes  
632 including 16 intervals in the gene *Mondo*. In *D. melanogaster* this did not constitute an enrichment  
633 relative to genome-wide. Outlier intervals that occur within shared genes between the two species include  
634 *CG7881*, *lola*, *mbfl* (a stress response gene), *Mhc*, *PI31*, and *Pka-1* (which has been implicated in the  
635 response to ethanol previously (Chen *et al.* 2008)). Note that for changes in the abundance of exons and  
636 exonic regions in *D. simulans*, if regions of low recombination are excluded from the candidate regions  
637 the enrichment is no longer significant, but there is no change among the other tests.

#### 638 639 ***Divergence***

640 We calculated  $D_{XY}$  for orthologous genes on the autosomes (10,435 genes) and the X (1,943 genes)  
641 between *D. melanogaster* and *D. simulans* (Figure 3B).  $D_{XY}$  was similar to that previously reported, with  
642 an average of 0.52 on the autosomes and 0.55 on the X (compared to 0.048 on the autosomes, 0.054 on  
643 the X (Nolte *et al.* 2013)). For the subsets of genes implicated in expression differences the mean was  
644 0.047 on the autosomes and 0.057 on the X for expression differences in *D. melanogaster* and 0.053 on  
645 the autosomes and 0.06 on the X in *D. simulans*. The genes implicated in changes in rank abundance in *D.*  
646 *melanogaster* had a mean  $D_{XY}$  of 0.047 on the autosomes and 0.05 on the X. In *D. simulans* this was  
647 0.049 on the autosomes and 0.059 on the X. To determine if the distribution of  $D_{XY}$  for any of the  
648 significant subsets of genes differed compared to the genome-wide distribution we used a Kolmogorov-  
649 Smirnov two-sample test, separately for genes on the X and the autosomes. In *D. melanogaster* exons and  
650 exonic regions that changed abundance in response to ethanol were not significantly different on the  
651 autosomes or the X. However, exons and exonic regions with significant differences in rank abundance  
652 did differ in distribution on the autosomes, but not the X (Autosomes:  $D = 0.14$ ,  $p = 0.002$ ). The genes  
653 implicated in expression differences on the autosomes in *D. simulans* differed significantly from the

654 genome-wide distribution, but not on the X (Autosomes:  $D = 0.061$ ,  $p = 0.005$ ). However, those  
655 implicated in changes in rank abundance did not, on the autosomes or the X. A difference in distribution  
656 does not indicate the direction of effect, and in fact in *D. melanogaster* the mean  $D_{XY}$  for changes in rank  
657 abundance is lower than genome-wide, while for expression differences in *D. simulans* it is slightly  
658 higher. This suggests that the genes implicated in changes in rank abundance in response to ethanol in *D.*  
659 *melanogaster* are somewhat more conserved than expected based on genome-wide distributions, while  
660 those implicated in expression differences in *D. simulans* are slightly less conserved. Note that because  
661 we can only include genes with orthologs here this does not include any of the abundant non-protein  
662 coding genes implicated in *D. simulans*, likely to be among the more rapidly evolving genes.

663 Population genetic patterns – or a lack thereof- among genes that respond to ethanol are difficult  
664 to interpret, in part because plastic responses may be due to a single regulatory change at an upstream  
665 gene. As the number of regulatory (or coding) changes involved in the plastic response are not known, it  
666 is difficult to interpret a lack of enrichment, as it is possible, for example, that only one of the genes  
667 whose expression changed could be under selection. Furthermore, it is not known whether the response to  
668 ethanol is adaptive – while it is presumed to be so in *D. melanogaster* due to its relative fitness on ethanol  
669 compared to *D. simulans*, functional links between gene expression differences and the phenotype were  
670 not established.

671

## 672 Discussion

673

674 In this study both *D. melanogaster* and *D. simulans* have a plastic response to the environment, but *D.*  
675 *melanogaster* is lacking in genetic variation for plasticity. Given the observed patterns, it appears most  
676 likely that for *D. simulans* 15% ethanol is a novel environment, and that the marked G x E is a passive  
677 stress response. This maladaptive plasticity would allow for the expression of previously cryptic variation  
678 that had accumulated in the absence of selection. In *D. melanogaster* this environment may not be  
679 stressful or novel, resulting in past selection removing genetic variation for plasticity that in *D. simulans*  
680 was allowed to neutrally accumulate. In this sense *D. melanogaster* may be more ‘locally adapted’, as it  
681 has evolved a reduced plastic response compared to *D. simulans*. However, it could also be that because  
682 *D. melanogaster* colonized the Americas a few thousand years prior to *D. simulans*, *D. simulans* has not  
683 yet reached an optimal level of plasticity (a nonequilibrium situation). Also, the frequency with which  
684 they encounter ethanol rich environments may vary for *D. simulans* and *D. melanogaster*, resulting in  
685 different selection pressures for developing the optimal level of plasticity – particularly if there is a trade-  
686 off with traits that are beneficial to the semi-domestic habitat of *D. simulans*. Trade-offs among  
687 genetically correlated traits may mean that a genotype with optimal phenotypic plasticity in one  
688 environment is constrained from evolving the optimal phenotype in another environment, resulting in the  
689 maintenance of variation for phenotypic plasticity.

690 Joshi and Thompson (1997) found that in *D. simulans* there was greater between family variation  
691 for the phenotypic response to ethanol substrate prior to selection for tolerance to ethanol. Compared to  
692 *D. melanogaster* and control populations, after selection in an ethanol environment the greatest change  
693 was a reduction in variation for plasticity between *D. simulans* families. Joshi and Thompson (1997)  
694 quantified phenotypes such as development time, which are not easily generalizable to expression  
695 patterns, but it is suggestive. However, in studies of other phenotypes in presumably adapted and non-  
696 adapted populations of *D. melanogaster*, no increase in genotype by environment response were observed  
697 in non-adapted populations (Heckel *et al.* 2016). This could be due to differences in the degree of stress or  
698 novelty of different environments, or it is possible that the response in *D. simulans* is due to something  
699 other than stress induced maladaptive plasticity.

700 The abundance of lncRNAs which are involved in genotype by environment interactions  
701 in *D. simulans* is perhaps not surprising, given that they have been implicated previously in the response  
702 to stress (Valadkhan & Valencia-Hipólito 2016). It is also possible they are more frequently involved  
703 because lncRNAs are often less conserved, as there is no requirement for the maintenance of ORFs and  
704 codon synonymy (Chodroff *et al.* 2010; Ulitsky *et al.* 2011; Quinn *et al.* 2016; Ulitsky 2016). It has been



705 observed previously that transcription evolves more quickly than sequences, and lncRNA are commonly  
706 homologous to non-transcribed sequences in other species, however these species are typically more  
707 diverged than *D. melanogaster* and *D. simulans* (Main *et al.* 2013; Ulitsky 2016). If neutral variation was  
708 allowed to accumulate without selection, and then uncovered in a stressful environment, preferential  
709 accumulation within less constrained sequences would be expected. *D. melanogaster* is also enriched for  
710 lncRNAs for the response to ethanol at 30 minutes, which could be explained by increasing ethanol stress  
711 over time. While it is possible that lncRNAs are indicative of stress-induced maladaptive plasticity this  
712 cannot be separated from a more general involvement in the stress response, which would not necessarily  
713 occur as a result of maladaptive plasticity.

714 Why the lncRNAs are preferentially nested in *D. simulans* is less easily envisioned, though four  
715 potential scenarios for an increase in nested lncRNAs are depicted in Figure 4. The simplest explanation  
716 is only that there has been a change in the expression of nested lncRNAs, and perhaps nested lncRNAs  
717 are more commonly involved in less essential processes than other lncRNAs and are therefore less  
718 constrained. It is also possible that ethanol causes a change in the intron stability of the spliced transcript,  
719 causing increased (or decreased) detection of the nested lncRNA (Figure 4). It is also possible that a  
720 change in the processing of the parental gene occurred, causing a change in the number of reads mapping  
721 to unspliced introns, or that the parental gene simply changed expression. These latter two explanations  
722 would predict correlation between the parental gene expression and nested gene expression, which was  
723 only observed for the very small fraction of lncRNAs that shared strandedness with their parental gene.  
724 Thus it is more likely that either nested lncRNAs are less constrained, or ethanol alters the stability of  
725 introns during or after the process of splicing.

726 The population genetic patterns observed in these two species are not easily interpreted. *D.*  
727 *melanogaster* does not show any increase in outliers for Tajima's *D* in any direction for either changes in  
728 rank abundance or expression (with the exception of fewer than expected on the X chromosome for *D.*  
729 *simulans* genes implicated in expression differences). *D. simulans* is an outlier in the positive direction for  
730 *D. melanogaster* genes implicated in differential expression, which could indicate that the genes involved  
731 in expression differences in *D. melanogaster* are subject to relaxed purifying or balancing selection in *D.*  
732 *simulans*. As these are all in the positive direction, it is worth noting that genome-wide *D. simulans* is  
733 biased towards positive values of Tajima's *D*, likely due to recent population contraction (Signor *et al.*  
734 2017c). While they are still more positive than expected due to background levels of Tajima's *D*, caution  
735 is also warranted in interpreting these patterns as due to selection. Among genes with expression  
736 differences and changes in rank abundance in *D. simulans*, there is an enrichment of outliers for  
737 expression differences on the autosome and X. This is due in large part to negative Tajima's *D* outliers,  
738 which given genome-wide patterns is overall more suggestive of selection, in this case directional  
739 selection. It may be that *D. simulans* phenotypic plasticity is currently not in equilibrium, and there is  
740 selection for an optimal phenotypic response. This can be true whether or not the observed response is  
741 due to maladaptive plasticity – diversity of the passive stress response to ethanol implies that some  
742 responses will be more beneficial than others, and there may be selection against the less adaptive stress  
743 responses.

744 Between species divergence ( $D_{XY}$ ) suggests that in *D. melanogaster* the genes involved in  
745 changes in rank abundance are less diverged than expected compared to background levels of divergence.  
746 In *D. simulans* the genes implicated in expression differences for exons and exonic regions are more  
747 diverged than expected based on background levels of divergence, which combined with being outliers  
748 for largely negative Tajima's *D* could indicate that they have been important for adaptation in *D.*  
749 *simulans*. However, given that the number of nucleotide differences involved in the response to the  
750 environment is unknown – for example all the observed patterns could be due to a single *trans* variant, it  
751 is difficult to interpret the results of Tajima's *D* and  $D_{XY}$  in terms of selection.

752 Inferring that gene expression differences are adaptive or non-adaptive remains a major challenge  
753 in the study of gene expression reaction norms, given the lack of direct correlation between gene  
754 expression phenotypes and organismal phenotypes. However, the patterns observed in *D. simulans* do  
755 suggest maladaptive plasticity in response to ethanol exposure. In this scenario abundant genotype by

756 environment interactions are expected to have accumulated neutrally and become uncovered in response  
 757 to environment stress. In contrast, in *D. melanogaster* this ethanol environment is not novel and  
 758 maladaptive plasticity has been selected out in favor of an adaptive phenotypic response. lncRNAs are  
 759 preferentially differentially expressed in *D. simulans* in response to ethanol either because they are less  
 760 constrained and can accumulate more neutral variation, or because they are involved in the general stress  
 761 response. It is also possible that environmental heterogeneity has caused *D. simulans* to maintain balanced  
 762 polymorphisms for plasticity in a way that has not occurred in *D. melanogaster*, though we believe there  
 763 is less evidence in favor of this interpretation. In the future comparing African, non-ethanol adapted  
 764 populations of *D. melanogaster* to cosmopolitan populations may be a way of discerning between these  
 765 hypotheses.  
 766  
 767  
 768

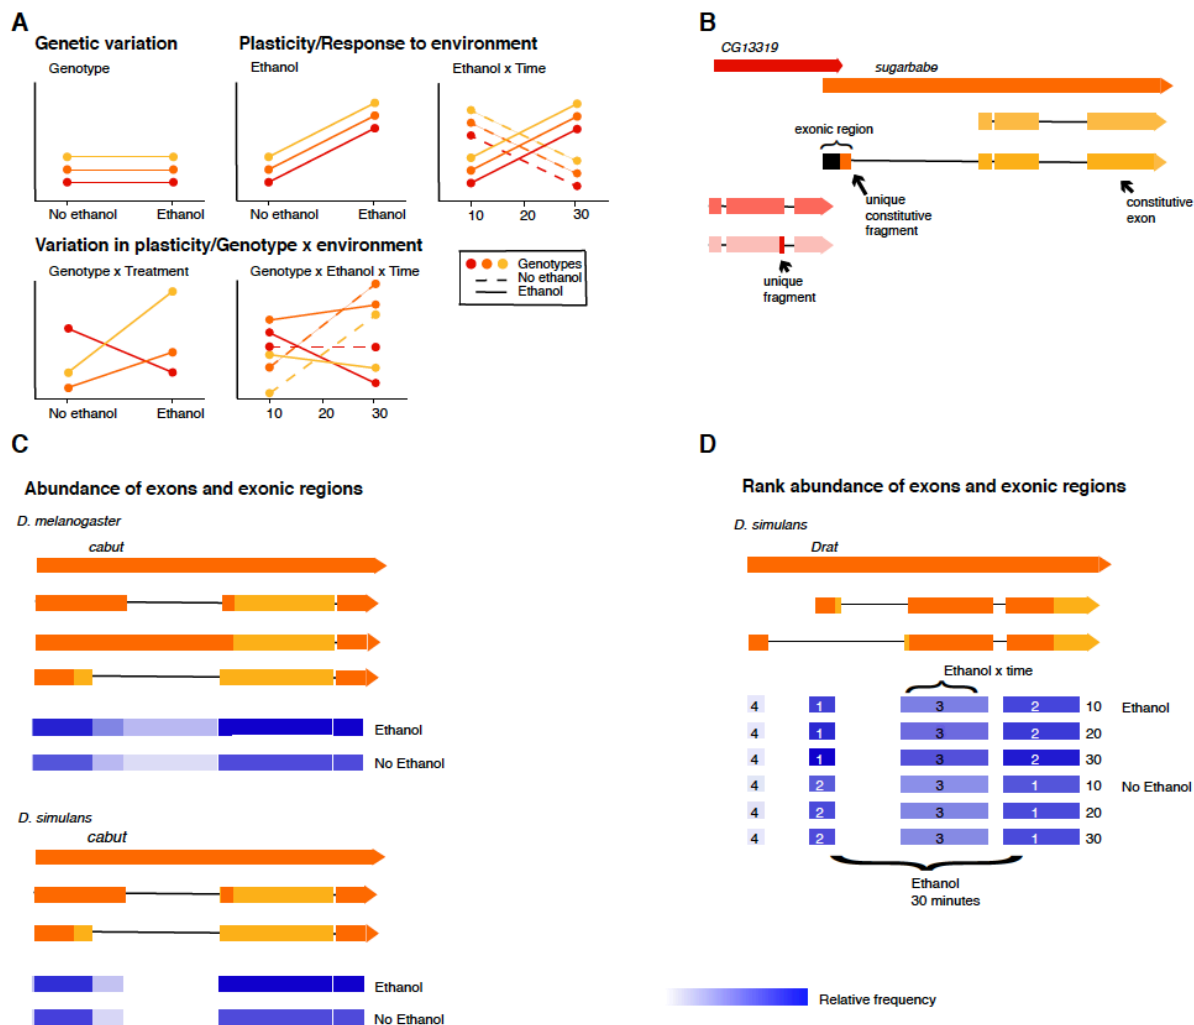

769

770

771 **Figure 1:** A. An illustration, for a single gene, of hypothetical gene expression changes for different  
 772 genotypes with different main and interaction effects. For main effect genotype, no difference is seen in  
 773 expression between environments but different genotypes have different expression levels. In response to  
 774 the environment (ethanol), gene expression level changes between environments but for every genotype it

775 changes in the same way. Ethanol by time is complicated by the fact that the x-axis is now time, and there  
776 are separate lines for ethanol (solid) and non-ethanol (dashed) environment. Here again there is a  
777 component of time for gene expression changes, but every genotype changes in the same manner. For  
778 genotype by environment interactions in the first panel different genotypes respond to ethanol differently,  
779 and in the second panel different genotypes respond to ethanol differently over time. **B.** An illustration of  
780 the classification scheme for exons, exonic regions, and exon fragments using the gene *sugarbabe*, which  
781 overlaps by an exon with its neighboring gene *CG13319*. Exons either do not overlap other exons in  
782 different isoforms (exons), or are fused regions consisting of a set of overlapping exons (exonic regions).  
783 Exonic regions can be decomposed into exon fragments, depending upon their overlap between different  
784 isoforms. Exons may be unique (found in a single isoform), common (found in some isoforms but not  
785 all), or constitutive (present in all isoforms), and if they are unique to a single isoform they may also be  
786 unique and constitutive if that is the only transcript annotated for that particular gene. As exonic regions  
787 require overlap between exons they may not be unique, but they may be common or constitutive. Exon  
788 fragments can be unique to a single isoform, common to several isoforms, or constitutive. Exon fragments  
789 may be unique and constitutive only in the situation of a multi-gene exonic region where one gene has a  
790 single isoform. **C.** An example of the information about gene expression and isoform abundance that can  
791 be inferred from measures of differential exon abundance. *cabut* is a relatively simple example, having  
792 few isoforms and exons, and yet it is still a complicated inter-species comparison given that *D.*  
793 *melanogaster* has more annotated isoforms than *D. simulans*. In *D. simulans* the first of two isoforms  
794 shown has a unique portion (fragment) that is more abundant in the presence of ethanol, suggesting that  
795 that isoform is more abundant. In *D. melanogaster* only the second of the three isoforms has a unique  
796 fragment, which is also more abundant in ethanol and suggests differential isoform usage. For both  
797 environments and species the most frequent exon is assigned 100% pigment, and all other frequencies are  
798 represented relative to that. **D.** An illustration of a change in the rank abundance of a gene, using the gene  
799 *Drat*. Only the example of *D. simulans* is shown, as *D. melanogaster* and *D. simulans* only overlapped by  
800 three genes with very complicated patterns of expression, such as *lola* with 24 annotated isoforms. *Drat*  
801 has two annotated isoforms in *D. simulans*, with two constitutive exons and two exons unique to each of  
802 the two isoforms. With ethanol, the exon unique to the first annotated transcript is the most abundant,  
803 while without ethanol the first constitutive exon is most abundant. In addition, the second constitutive  
804 exon is significant for changes in abundance (**A**) for the interaction between treatment and time, and the  
805 two constitutive exons and exon unique to the first transcript have significant differences in expression for  
806 ethanol, and between environments at 30 minutes. The dynamic changes in the expression of different  
807 exons are captured in different ways by these three approaches to quantifying changes in expression and  
808 splicing, where even within one gene there can be four complicated effects on expression characterized by  
809 two approaches.

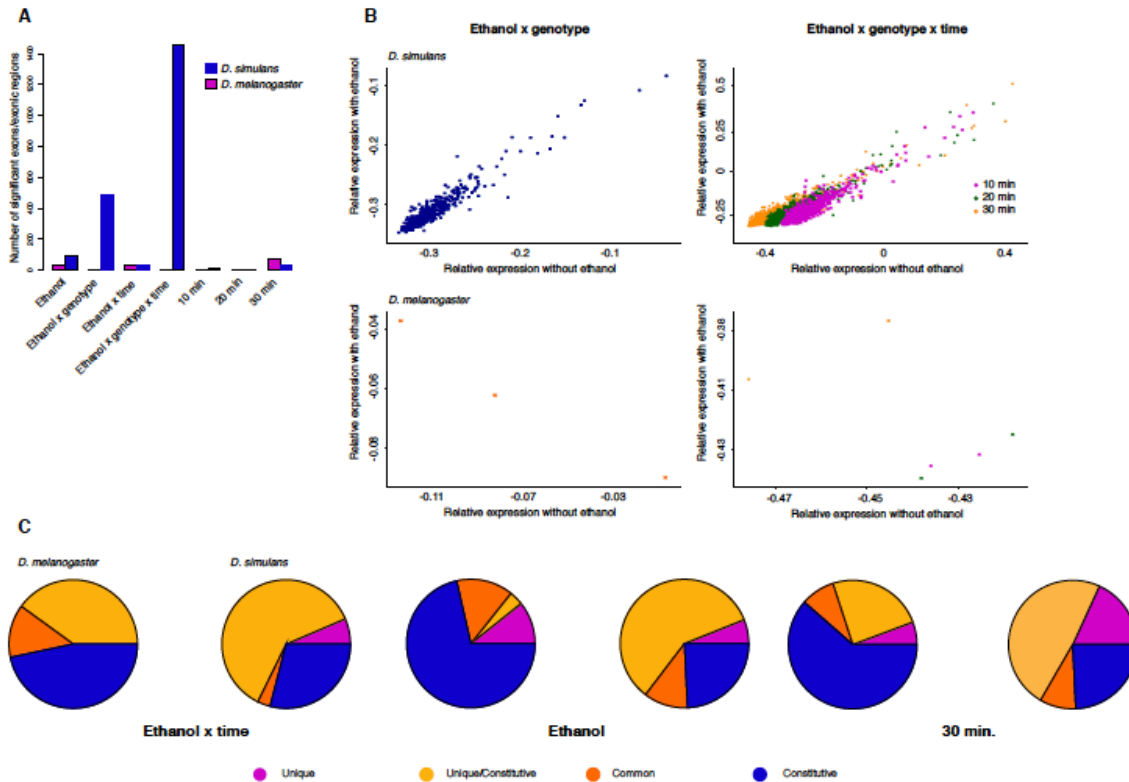

810  
 811 **Figure 2: A.** Components of variance for *D. melanogaster* and *D. simulans*. The number of significant  
 812 exons and exonic regions for each component of variance are shown. Please note that in cases where so  
 813 few exons and exonic regions are significant that no color can be seen, *D. melanogaster* is always on the  
 814 left. Many more exons and exonic regions are significant for *D. simulans* than *D. melanogaster*, but only  
 815 for components of variance that contain an interaction with genotype. **B.** *D. melanogaster* and *D.*  
 816 *simulans* differ markedly in their genotype-specific reactions to ethanol, thus shown here is the relative  
 817 expression in ethanol ( $y$ -axis) against the relative expression without ethanol ( $x$ -axis) for all genes with an  
 818 interaction term with genotype. Too few genes are significant in *D. melanogaster* to make anything but a  
 819 qualitative comparison, but the graphs serve to illustrate the magnitude and nature of this contrast. **C.** The  
 820 proportion of exons and exonic regions that are either unique, unique/constitutive, common, or  
 821 constitutive for the three components of variance for which a reasonable number of genes are significant  
 822 in *D. melanogaster*. Note that while species names are only indicated for the first component of variance,  
 823 *D. melanogaster* is on the left for every comparison. *D. melanogaster* has far more ‘constitutive’ exons  
 824 and exonic regions compared to *D. simulans*, where unique/constitutive is more common. This is likely  
 825 due to differences in the annotation of isoforms between the species, where *D. melanogaster* has more  
 826 isoforms per gene annotated. It is also possible that alternatively spliced genes are more important for  
 827 expression differences in *D. melanogaster*.  
 828  
 829

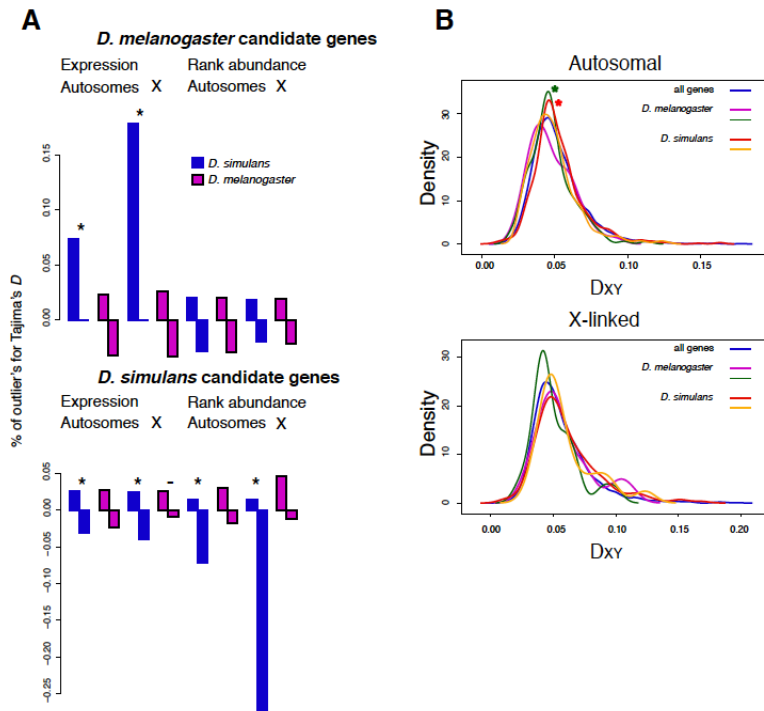

830  
 831 **Figure 3: A.** The percentage of intervals that were considered outliers in *D. melanogaster* and *D.*  
 832 *simulans*, split between the autosomes and the X. The percentage of intervals that are outliers are shown  
 833 separately for positive and negative, with the percent negative shown as a negative number. Note that the  
 834 percentage is not actually negative but rather serves to illustrate the distinction between positive and  
 835 negative. Enrichment for outlier intervals was determined as a composite of positive and negative  
 836 intervals. Significant enrichment is indicated by a star, significant under-enrichment is illustrated with a  
 837 minus sign. *D. melanogaster* is always on the left. The genome-wide cutoff for outliers was  $\pm 2.5\%$ , thus  
 838 enrichment is anything significantly more than or less than 5% for the positive and negative intervals  
 839 together. **B.** The distribution of  $D_{xy}$  for *D. simulans* and *D. melanogaster*, compared to the genome-wide  
 840 background distribution of  $D_{xy}$ . The genes are split between the autosomes (top) and X-linked (bottom),  
 841 and the genome-wide background distribution is shown in blue. For *D. melanogaster* and *D. simulans* the  
 842 color corresponding to changes in the abundance of exons or exonic regions is shown first, while that  
 843 corresponding to changes in rank abundance is shown second, i.e. *D. melanogaster* pink – changes in  
 844 overall abundance; green – changes in rank abundance.  
 845  
 846

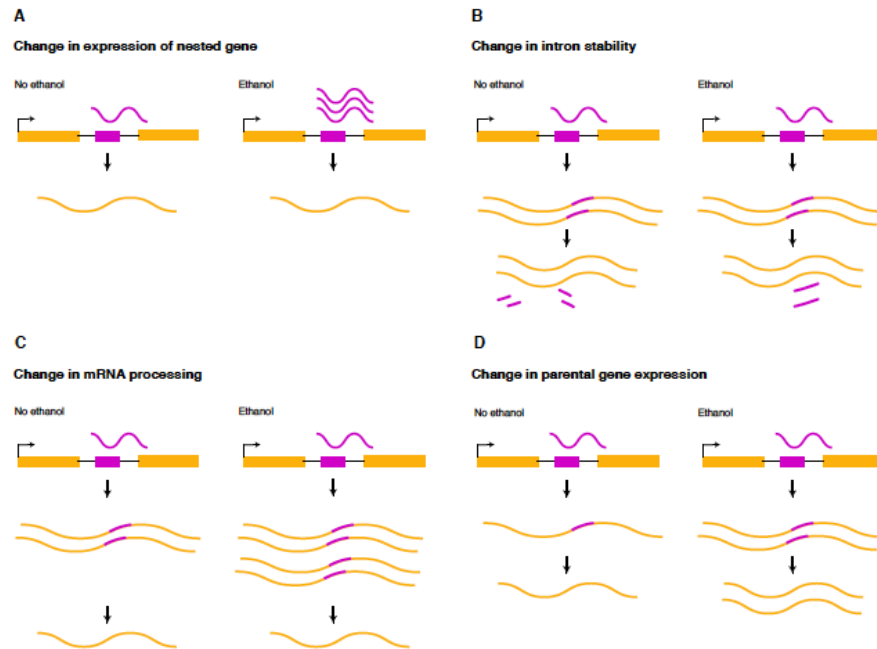

847  
848 **Figure 4:** An illustration of the possible explanations for an enrichment in nested genes, and nested non-  
849 protein coding genes, in *D. simulans*. Note that in each illustration there are many possible details for  
850 each scenario – for example gene expression could increase or decrease in the presence of ethanol, but we  
851 illustrate here an increase in scenario **A**. This does not assume that this particular change is more likely,  
852 only that illustrating both an increase and a decrease will not aid in the readers comprehension. **A**. In the  
853 first scenario the nested gene changes its expression without any relationship with the expression of its  
854 parental gene, as shown by the number of squiggly lines representing RNA. Generic exons are  
855 represented by colored squares, introns by lines. The parental gene is shown in mustard yellow, and the  
856 nested gene in magenta, with RNA belonging to either in matching colors **B**. It is possible that ethanol  
857 alters the stability of introns after they are spliced out of the maturing transcript from the parental gene,  
858 potentially altering the expression level of the non-protein coding gene within the intron. Shown here and  
859 in the remaining scenarios is an extra step, with an unspliced RNA transcript from the parental gene  
860 preceding a spliced transcript. We do not attempt to accurately depict the process or machinery of  
861 splicing, only to illustrate that while expression of the nested gene may occur independently, some  
862 expression may also occur from introns as they are spliced out of the parental gene. **C**. Expression of the  
863 nested gene could also be affected if there were changes in the number of unspliced transcripts, for  
864 example through ethanol-induced alterations in the rate of splicing. **D**. The expression of the nested gene  
865 could also appear to change, or actually change through changes in the expression of the parental gene.  
866 Note that **C-D** would all predict some amount of correlation between parental gene expression and nested  
867 gene expression – such that if a change in nested gene expression is detected a change in parental gene  
868 expression would generally be expected as well.

869  
870 **Competing interests**

871 The authors declare that they have no competing interests.

872

873 **Funding**

874 This work was supported by grants GM102227 and MH09156.

875

876 **Author's contributions**

877 S.S. performed the experiments, analyzed the dataset, and wrote the manuscript. S.V.N. conceived of the  
878 experiment and assisted in writing the manuscript.

879

## 880 **Acknowledgements**

881 The authors would like to thank Jeremy Newman and Lauren McIntyre for contributions to the manuscript.  
882 The authors would like to thank our undergraduate researchers for assistance in producing this data: N.  
883 Shadman, V. Paterson, Z. Polonus, K. Cortez, L. Hassanzadeh, L. Cline, A. Khokhar, E. Lee, K.L. Yee, M.  
884 Ling, S. Sarva, O. Akintonwa, A. Gupta, R. Manson, P. Hassanzadeh, and K. Kavoussi. Lastly, the authors  
885 would like to thank B. & C. Emery for thoughtful commentary.

886

887

888 Agrawal A, Hinrichs AL, Dunn G *et al.* (2008) Linkage scan for quantitative traits identifies new regions  
889 of interest for substance dependence in the Collaborative Study on the Genetics of Alcoholism  
890 (COGA) sample. *Drug and Alcohol Dependence*, **93**, 12–20.

891 Aubin-Horth N, Renn SCP (2009) Genomic reaction norms: using integrative biology to understand  
892 molecular mechanisms of phenotypic plasticity. *Molecular Ecology*, **18**, 3763–3780.

893 Austin CJ, Moehring AJ (2013) Optimal temperature range of a plastic species, *Drosophila simulans* (S  
894 Plaistow, Ed.). *Journal of Animal Ecology*, **82**, 663–672.

895 Bae SH, Sung SH, Cho EJ *et al.* (2011) Concerted action of sulfiredoxin and peroxiredoxin I protects  
896 against alcohol-induced oxidative injury in mouse liver. *Hepatology*, **53**, 945–953.

897 Barbosa-Morais NL, Irimia M, Pan Q *et al.* (2012) The evolutionary landscape of alternative splicing in  
898 vertebrate species. *Science*, **338**, 1587–1593.

899 Benjamini Y, Hochberg Y (1995) Controlling the false discovery rate: a practical and powerful approach  
900 to multiple testing. *Journal of the Royal Statistical Society, Series B*, **57**, 289–300.

901 Bergland AO, Tobler R, González J, Schmidt P, Petrov D (2016) Secondary contact and local adaptation  
902 contribute to genome-wide patterns of clinal variation in *Drosophila melanogaster*. *Molecular*  
903 *Ecology*, **25**, 1157–1174.

904 Boivin V, Deschamps-Francoeur G, Scott MS (2018) Protein coding genes as hosts for noncoding RNA  
905 expression. *Seminars in Cell & Developmental Biology*, **75**, 3–12.

906 Bullard JH, Purdom E, Hansen KD, Dudoit S (2010) Evaluation of statistical methods for normalization  
907 and differential expression in mRNA-Seq experiments. *BMC Bioinformatics*, **11**, 94–13.

908 Calixto CPG, Guo W, James AB *et al.* (2018) Rapid and dynamic alternative splicing impacts the  
909 Arabidopsis cold response transcriptome. *The Plant Cell*, tpc.00177.2018–45.

910 Campo D, Lehmann K, Fjeldsted C *et al.* (2013) Whole-genome sequencing of two North American  
911 *Drosophila melanogaster* populations reveals genetic differentiation and positive selection.  
912 *Molecular Ecology*, **22**, 5084–5097.

913 Chakir M, Peridy O, Capy P, Pla E, David JR (1993) Adaptation to alcoholic fermentation in *Drosophila*:  
914 A parallel selection imposed by environmental ethanol and acetic acid. *Proceedings of the National*  
915 *Academy of Sciences*, **90**, 3621–3625.

916 Chakraborty M, Fry JD (2016) Evidence that environmental heterogeneity maintains a detoxifying  
917 enzyme polymorphism in *Drosophila melanogaster*. *Current Biology*, **26**, 219–223.

918 Chattopadhyay A, Pinkaew D, Doan HQ *et al.* (2015) Fortilin potentiates the peroxidase activity of  
919 Peroxiredoxin-1 and protects against alcohol-induced liver damage in mice. *Scientific Reports*, 1–16.

920 Chen J, Zhang Y, Shen P (2008) A protein kinase C activity localized to neuropeptide Y–like neurons  
921 mediates ethanol intoxication in *Drosophila melanogaster*. *Neuroscience*, **156**, 42–47.

922 Cheviron ZA, Whitehead A, Brumfield RT (2008) Transcriptomic variation and plasticity in rufous-  
923 collared sparrows (*Zonotrichia capensis*) along an altitudinal gradient. *Molecular Ecology*, **17**,  
924 4556–4569.

925 Chodroff RA, Goodstadt L, Sirey TM *et al.* (2010) Long noncoding RNA genes: conservation of  
926 sequence and brain expression among diverse amniotes. *Genome Biology*, **11**, R72.

- 927 Dalton JE, Fear JM, Knott S *et al.* (2013) Male-specific Fruitless isoforms have different regulatory roles  
928 conferred by distinct zinc finger DNA binding domains. *BMC Genomics*, **14**, 659.
- 929 David J, Bocquet C (1976) Compared toxicities of different alcohols for two *Drosophila* sibling species:  
930 *D. melanogaster* and *D. simulans*. *Comparative biochemistry and physiology. C: Comparative*  
931 *pharmacology*, **54**, 71–74.
- 932 David JR, Bocquet C (1975) Similarities and differences in latitudinal adaptation of two *Drosophila*  
933 sibling species. *Nature*, **257**, 588–590.
- 934 Davies MN, Krause L, Bell JT *et al.* (2014) Hypermethylation in the ZBTB20 gene is associated with  
935 major depressive disorder. *Genome Biology*, **15**, R56–12.
- 936 DeBiasse MB, Kelly MW (2015) Plastic and evolved responses to global Change: What can we learn  
937 from comparative transcriptomics? *The Journal of Heredity*, **107**, 71–81.
- 938 Dickinson WJ, Rowan RG, Brennan MD (1984) Regulatory gene evolution: adaptive differences in  
939 expression of *alcohol dehydrogenase* in *Drosophila melanogaster* and *Drosophila simulans*.  
940 *Heredity*, **52 ( Pt 2)**, 215–225.
- 941 Dillies MA, Rau A, Aubert J *et al.* (2013) A comprehensive evaluation of normalization methods for  
942 Illumina high-throughput RNA sequencing data analysis. *Briefings in Bioinformatics*, **14**, 671–683.
- 943 Fear JM, León-Novelo LG, Morse AM *et al.* (2016) Buffering of genetic regulatory networks in  
944 *Drosophila melanogaster*. *Genetics*, **203**, 1177–1190.
- 945 Fry JD (2014) Mechanisms of naturally evolved ethanol resistance in *Drosophila melanogaster*. *Journal*  
946 *of Experimental Biology*, **217**, 3996–4003.
- 947 Ghalambor CK, Hoke KL, Ruell EW *et al.* (2015) Non-adaptive plasticity potentiates rapid adaptive  
948 evolution of gene expression in nature. *Nature*, **525**, 372–375.
- 949 Ghalambor CK, McKay JK, Carroll SP, Reznick DN (2007) Adaptive versus non-adaptive phenotypic  
950 plasticity and the potential for contemporary adaptation in new environments. *Functional Ecology*,  
951 **21**, 394–407.
- 952 Gibson JB, Wilks AV (1988) The alcohol dehydrogenase polymorphism of *Drosophila melanogaster* in  
953 relation to environmental ethanol, ethanol tolerance and alcohol dehydrogenase activity. *Heredity*, **60**  
954 **( Pt 3)**, 403–414.
- 955 Graze RM, McIntyre LM, Morse AM *et al.* (2014) What the X has to do with it: Differences in regulatory  
956 variability between the sexes in *Drosophila simulans*. *Genome Biology and Evolution*, **6**, 818–829.
- 957 Gueroussov S, Gonatopoulos-Pournatzis T (2015) An alternative splicing event amplifies evolutionary  
958 differences between vertebrates. *Science*, **349**, 868–73.
- 959 Guntrip J, Sibly RM (1998) Phenotypic plasticity, genotype-by-environment interaction and the analysis  
960 of generalism and specialization in *Callosobruchus maculatus*. *Heredity*, **81**, 198–204.
- 961 Hamidovic A, Goodloe RJ, Young TR *et al.* (2013) Genetic analysis of a population heavy drinking  
962 phenotype identifies risk variants in whites. *Journal of Clinical Psychopharmacology*, **33**, 206–210.
- 963 Heckel von K, Stephan W, Hutter S (2016) Canalization of gene expression is a major signature of  
964 regulatory cold adaptation in temperate *Drosophila melanogaster*. *BMC Genomics*, 1–14.
- 965 Hemby SE (2012) Alternative splicing of AMPA subunits in prefrontal cortical fields of cynomolgus  
966 monkeys following chronic ethanol self-administration. *Frontiers in Psychiatry*, **3**, 72.
- 967 Hodgins-Davis A, Townsend JP (2009) Evolving gene expression: from G to E to G×E. *Trends in*  
968 *Ecology & Evolution*, **24**, 649–658.
- 969 Hodgins-Davis A, Adomas AB, Warringer J, Townsend JP (2012) Abundant gene-by-environment  
970 interactions in gene expression reaction norms to copper within *Saccharomyces cerevisiae*. *Genome*  
971 *Biology and Evolution*, **4**, 1061–1079.
- 972 Hoffmann AA, McKechnie SW (1991) Heritable variation in resource utilization and response in a  
973 winery population of *Drosophila melanogaster*. **45**, 1000.
- 974 Hoffmann AA, Weeks AR (2006) Climatic selection on genes and traits after a 100 year-old invasion: a  
975 critical look at the temperate-tropical clines in *Drosophila melanogaster* from eastern Australia.  
976 *Genetica*, **129**, 133–147.



- 977 Huang Y, Agrawal AF (2016) Experimental evolution of gene expression and plasticity in alternative  
978 selective regimes. *PLoS Genetics*, **12**, e1006336.
- 979 Hyytia P, Capy P, David JR, Singh RS (1985) Enzymatic and quantitative variation in European and  
980 African populations of *Drosophila simulans*. *Heredity*, **54**, 209–217.
- 981 Jakšić AM, Schlötterer C (2016) The interplay of temperature and genotype on patterns of alternative  
982 splicing in *Drosophila melanogaster*. *Genetics*, **204**, 315–325.
- 983 Joshi A, Thompson JN (1997) Adaptation and specialization in a two-resource environment in  
984 *Drosophila* species. **51**, 846.
- 985 Lande R (2009) Adaptation to an extraordinary environment by evolution of phenotypic plasticity and  
986 genetic assimilation. *Journal of Evolutionary Biology*, **22**, 1435–1446.
- 987 Lee CE, Kiergaard M, Gelembiuk GW, Eads BD, Posavi M (2011) Pumping ions: Rapid parallel  
988 evolution of ionic regulation following habitat invasions. *Evolution*, **65**, 2229–2244.
- 989 Lee YCG, Chang HH (2013) The evolution and functional significance of nested gene structures in  
990 *Drosophila melanogaster*. *Genome Biology and Evolution*, **5**, 1978–1985.
- 991 Lefèvre T, de Roode JC, Kacsoh BZ, Schlenke TA (2012) Defense strategies against a parasitoid wasp in  
992 *Drosophila*: fight or flight? *Biology Letters*, **8**, 230–233.
- 993 Levine MT, Eckert ML, Begun DJ (2011) Whole-genome expression plasticity across tropical and  
994 temperate *Drosophila melanogaster* populations from Eastern Australia. *Molecular Biology and*  
995 *Evolution*, **28**, 249–256.
- 996 Lewis JA, Broman AT, Will J, Genetics AG, 2014 Genetic architecture of ethanol-responsive  
997 transcriptome variation in *Saccharomyces cerevisiae* strains. *Genetics*, **198**, 369–382.
- 998 Li H (2015) Aligning sequence reads, clone sequences and assembly contigs with BWA-MEM.  
999 *arXiv:1303.3997*.
- 1000 Liu G, Zhou L, Zhang H *et al.* (2017) Regulation of hepatic lipogenesis by the zinc finger protein Zbtb20.  
1001 *Nature Communications*, **8**, 1–13.
- 1002 Machado HE, Bergland AO, O'Brien KR *et al.* (2015) Comparative population genomics of latitudinal  
1003 variation in *D. simulans* and *D. melanogaster*. *Molecular Ecology*, **25**, 723–740.
- 1004 Main BJ, Smith AD, Jang H, Nuzhdin SV (2013) Transcription start site evolution in *Drosophila*.  
1005 *Molecular Biology and Evolution*, **30**, 1966–1974.
- 1006 Marais Des DL, Hernandez KM, Juenger TE (2013) Genotype-by-environment interaction and plasticity:  
1007 Exploring genomic responses of plants to the abiotic environment. *Annual Review of Ecology,*  
1008 *Evolution, and Systematics*, **44**, 5–29.
- 1009 Mathur V, Schmidt PS (2016) Adaptive patterns of phenotypic plasticity in laboratory and field  
1010 environments in *Drosophila melanogaster*. *Evolution*, **71**, 465–474.
- 1011 Matzkin LM (2012) Population transcriptomics of cactus host shifts in *Drosophila mojavensis*. *Molecular*  
1012 *Ecology*, **21**, 2428–2439.
- 1013 McCairns RJS, Bernatchez L (2009) Adaptive divergence between freshwater and marine sticklebacks:  
1014 insights into the role of phenotypic plasticity from an integrated analysis of candidate gene  
1015 expression. *Evolution*, **64**, 1029–1047.
- 1016 McKenzie JA, McKechnie SW (1979) A comparative study of resource utilization in natural populations  
1017 of *Drosophila melanogaster* and *D. simulans*. *Oecologia*, **40**, 299–309.
- 1018 Mercot H, Defaye D, Capy P, Pla E, David JR (1994) Alcohol tolerance, ADH activity, and ecological  
1019 niche of *Drosophila* species. **3**, 746–757.
- 1020 Merkin J, Russell C, Chen P, Burge CB (2012) Evolutionary dynamics of gene and isoform regulation in  
1021 Mammalian tissues. *Science*, **338**, 1593–1599.
- 1022 Mi H, Huang X, Muruganujan A *et al.* (2017) PANTHER version 11: expanded annotation data from  
1023 Gene Ontology and Reactome pathways, and data analysis tool enhancements. *Nucleic Acids*  
1024 *Research*, **45**, D183–D189.
- 1025 Newell NR, New FN, Dalton JE *et al.* (2016) Neurons that underlie *Drosophila melanogaster*  
1026 reproductive behaviors: detection of a large male-bias in gene expression in *fruitless*-expressing  
1027 neurons. *Genes, Genomes, Genetics*, **6**, 2455–2465.

- 1028 Newton PM, Tully K, McMahon T *et al.* (2004) Chronic ethanol exposure induces an N-type calcium  
1029 channel splice variant with altered channel kinetics. *FEBS Letters*, **579**, 671–676.
- 1030 Nolte V, Pandey RV, Kofler R, Schlötterer C (2013) Genome-wide patterns of natural variation reveal  
1031 strong selective sweeps and ongoing genomic conflict in *Drosophila mauritiana*. *Genome Research*,  
1032 **23**, 99–110.
- 1033 Oomizu S, Boyadjieva N, Sarkar DK (2003) Ethanol and estradiol modulate alternative splicing of  
1034 dopamine D2 receptor messenger RNA and abolish the inhibitory action of bromocriptine on  
1035 prolactin release from the pituitary gland. *Alcoholism: Clinical and Experimental Research*, **27**, 975–  
1036 980.
- 1037 Pages H, Aboyoun P, Gentleman R, Version SDRP (2017) Biostrings: Efficient manipulation of  
1038 biological strings.
- 1039 Pajoro A, Severing E, Angenent GC, Immink RGH (2017) Histone H3 lysine 36 methylation affects  
1040 temperature-induced alternative splicing and flowering in plants. **18**, 102.
- 1041 Paradis E (2010) pegas: an R package for population genetics with an integrated-modular approach.  
1042 *Bioinformatics*, **26**, 419–420.
- 1043 Paradis E, Claude J, Strimmer K (2004) APE: Analyses of Phylogenetics and Evolution in R language.  
1044 *Bioinformatics*, **20**, 289–290.
- 1045 Parsons PA, King SB (1977) Ethanol: Larval discrimination between two *Drosophila* sibling species.  
1046 *Experientia*, **33**, 898–899.
- 1047 Parsons PA, Spence GE (1981) Ethanol utilization: threshold differences among three *Drosophila*  
1048 species. *The American Naturalist*, **117**, 568–571.
- 1049 Parsons PA, Stanley SM, Spence GE (1979) Environmental ethanol at low concentrations: Longevity and  
1050 development in the sibling species *Drosophila melanogaster* and *D. simulans*. *Australian Journal of*  
1051 *Zoology*, **27**, 747–754.
- 1052 Pietrzykowski AZ, Friesen RM, Martin GE *et al.* (2008) Posttranscriptional regulation of BK channel  
1053 splice variant stability by miR-9 underlies neuroadaptation to alcohol. *Neuron*, **59**, 274–287.
- 1054 Preußner M, Goldammer G, Neumann A *et al.* (2017) Body temperature cycles control rhythmic  
1055 alternative splicing in mammals. *Molecular Cell*, **67**, 433–446.e4.
- 1056 Price J, Harrison MC, Hammond RL *et al.* (2018) Alternative splicing associated with phenotypic  
1057 plasticity in the bumble bee *Bombus terrestris*. *Molecular Ecology*, **27**, 1036–1043.
- 1058 Quinn JJ, Zhang QC, Georgiev P *et al.* (2016) Rapid evolutionary turnover underlies conserved lncRNA-  
1059 genome interactions. *Genes & development*, **30**, 191–207.
- 1060 Robinson BG, Atkinson NS (2013) Is alcoholism learned? Insights from the fruit fly. *Current Opinion in*  
1061 *Neurobiology*, **23**, 529–534.
- 1062 Rutherford SL (2000) From genotype to phenotype: buffering mechanisms and the storage of genetic  
1063 information. *BioEssays*, **22**, 1095–1105.
- 1064 Sasabe T, Ishiura S (2010) Alcoholism and alternative splicing of candidate genes. *International Journal*  
1065 *of Environmental Research and Public Health*, **7**, 1448–1466.
- 1066 Schmidt PS, Paaby AB (2008) Reproductive diapause and life-history clines in North American  
1067 populations of *Drosophila melanogaster*. *Evolution*, **62**, 1204–1215.
- 1068 Scoville AG, Pfrender ME (2010) Phenotypic plasticity facilitates recurrent rapid adaptation to introduced  
1069 predators. *Proceedings of the National Academy of Sciences*, **107**, 4260–4263.
- 1070 Sedghifar A, Saelao P, Begun DJ (2016) Genomic patterns of geographic differentiation in *Drosophila*  
1071 *simulans*. *Genetics*, **202**, 1229–1240.
- 1072 Shi J, Li W, Ding X (2018) Assessment of the association between ZBTB20 rs9841504 polymorphism  
1073 and gastric and esophageal cancer susceptibility: A meta-analysis. *The International Journal of*  
1074 *Biological Markers*, **32**, 96–101.
- 1075 Signor S, Nuzhdin S (2018, *in press*). Dynamic changes in gene expression and alternative splicing  
1076 mediate the response to acute alcohol exposure in *Drosophila melanogaster*. *Heredity*.
- 1077 Signor SA, Abbasi M, Marjoram P, Nuzhdin SV (2017a) Social effects for locomotion vary between  
1078 environments in *Drosophila melanogaster* females. *Evolution*, **71**, 1765–1775.

- 1079 Signor SA, Abbasi M, Marjoram P, Nuzhdin SV (2017b) Conservation of social effects ( $\Psi$ ) between two  
1080 species of *Drosophila* despite reversal of sexual dimorphism. *Ecology and Evolution*, **7**, 10031–  
1081 10041.
- 1082 Signor SA, New FN, Nuzhdin S (2017c) A large panel of *Drosophila simulans* reveals an abundance of  
1083 common variants. *Genome Biology and Evolution*, **10**, 189–206.
- 1084 Singh P, Börger C, More H, Sturmbauer C (2017) The role of alternative splicing and differential gene  
1085 expression in cichlid adaptive radiation. *Genome Biology and Evolution*, **9**, 2764–2781.
- 1086 Singh RS (1989) Population genetics and evolution of species related to *Drosophila melanogaster*.  
1087 *Annual Review of Genetics*, **23**, 425–453.
- 1088 Thomson MS, Jacobson JW, Laurie CC (1991) Comparison of alcohol dehydrogenase expression in  
1089 *Drosophila melanogaster* and *D. simulans*. *Molecular Biology and Evolution*, **8**, 31–48.
- 1090 Ulitsky I (2016) Evolution to the rescue: using comparative genomics to understand long non-coding  
1091 RNAs. *Nature Reviews Genetics*, **17**, 601–614.
- 1092 Ulitsky I, Shkumatava A, Jan CH, Sive H, Bartel DP (2011) Conserved function of lincRNAs in  
1093 vertebrate embryonic development despite rapid sequence evolution. *Cell*, **147**, 1537–1550.
- 1094 Valadkhan S, Valencia-Hipolito A (2016) lncRNAs in stress response. *Current Topics in Microbiology  
1095 and Immunity*, **394**, 203-236.
- 1096 Via S, Lande R (1985) Genotype-environment interaction and the evolution of phenotypic plasticity.  
1097 *Evolution*, **39**, 505–522.
- 1098 Wang G, Weng L, Li M, Xiao H (2017) Response of gene expression and alternative splicing to distinct  
1099 growth environments in tomato. *International Journal of Molecular Sciences*, **18**, 475–19.
- 1100 Watada M, Tobari YN, Ohba S (1986) Genetic differentiation in Japanese populations of *Drosophila  
1101 simulans* and *D. melanogaster*. *The Japanese Journal of Genetics*, **61**, 253–269.
- 1102 Weeks AR, McKechnie SW, Hoffmann AA (2002) Dissecting adaptive clinal variation: markers,  
1103 inversions and size/stress associations in *Drosophila melanogaster* from a central field population.  
1104 *Ecology letters*, **5**, 756–763.
- 1105 Wright E (2016) Using DECIPHER v2. 0 to analyze big biological sequence data in R. *The R Journal*, **8**,  
1106 352–359.
- 1107 Yampolsky LY, Glazko GV, Fry JD (2012) Evolution of gene expression and expression plasticity in  
1108 long-term experimental populations of *Drosophila melanogaster* maintained under constant and  
1109 variable ethanol stress. *Molecular Ecology*, **21**, 4287–4299.
- 1110 Yang H-P, Nuzhdin SV (2003) Fitness costs of *Doc* expression are insufficient to stabilize its copy  
1111 number in *Drosophila melanogaster*. *Molecular Biology and Evolution*, **20**, 800–804.
- 1112 Zaharieva E, Chipman JK, Soller M (2012) Alternative splicing interference by xenobiotics. *Toxicology*,  
1113 **296**, 1–12.
- 1114 Zhu J, Fry JD (2015) Preference for ethanol in feeding and oviposition in temperate and tropical  
1115 populations of *Drosophila melanogaster*. *Entomologia Experimentalis et Applicata*, **155**, 64-70.  
1116
